# Supplementary material for: Acquisition, maintenance and adaptation of invasion inhibitory antibodies against Plasmodium falciparum invasion ligands involved in immune evasion
Source: PLoS One. 2017 Aug 7;12(8):e0182187. doi: 10.1371/journal.pone.0182187 (PMC5546579; doi:10.1371/journal.pone.0182187)
Supplement: S1 Table — The OD values were all measure at 405nM and percent invasion were determined relative to the control. (XLSX) [file pone.0182187.s006.xlsx]

## Sheet: S1 Table
Sample ID	Days	Parasitaemia	140KO % invasion	175KO % invasion	181KO % invasion	WT % invasion	EBA140 OD	EBA175 OD	EBA181 OD	MSP2 OD	PfRh2 OD	PfRh4 OD
AD01	0	0	96.1783	79.3738			0	0.1677	0.156684	0.081796	0.104843	0.00331172
	30	0	93.2059	78.1768			0	0.231659	0.169571	0.0906685	0.12246	0
	60	0	91.5074	68.3241			0	0.200399	0.196225	0.0835705	0.0888783	0.00403868
	90		93.8429	80.7551			0	0.189979	0.155367	0.0862745	0.0489962	0
	120	80	88.1104	77.9006			0	0.16839	0.124601	0.068445	0.0705277	0
	150	160	83.5456	75.046			0	0.165512	0.108258	0.0876265	0.0951176	0
	180	0	88.7473	66.9429			0.242089	0.496075	0.74947	0.756444	0.329088	0.106217
	210	0	93.0998	67.7716			0.0731363	0.424171	0.591032	0.57367	0.236356	0.0429715
AD02	0	704	95.1168	75.9669			0	0.257047	0.00405831	0.54663	0.084413	0
	30	832	96.2845	60.9576			0	0.209207	0	0.611864	0.0767057	0
	60	0	80.0425	52.4862			0	0.253766	0	0.963553	0.118117	0
	90	7520	85.5626	56.0773			0	0.249966	0.00411315	0.934908	0.121298	0
	120	1136	69.5329	59.7606			0	0.213985	0	0.846774	0.148273	0
	150	1168	74.7346	59.3923			0.00129887	0.19873	0	1.06563	0.1298	0.0119545
	180	192	84.3949	57.4586			0	0.175414	0.00625199	1.02955	0.100378	0.000484641
	210	640	72.7176	65.2855			0.0138879	0.176968	0.330039	1.07602	0.138609	0
AD04	0	0	93.6695	87.0146	67.5	73.1788	0.0853257	0.00800215	0.721117	0.892658	0.277034	0.0148623
	30	0	28.4335	2.3301	3.31034	9.3543	0.0941181	0.0243519	0.703568	0.651579	0.263638	0.0265745
	60	32	71.5665	101.699	83.2759	76.3245	0.0595482	0.0382261	0.578254	0.53404	0.223817	0.0262514
	90	0	71.3519	90.7767	70.1724	81.1258	0.0695395	0.00120896	0.513595	0.421401	0.215131	0.0257668
	120	0	61.8026	80.8252	61.5517	66.3079	0.0601477	0.0184222	0.507343	0.355491	0.212562	0.0275438
	150	0	75.8584	85.801	56.8103	74.0894	0.0552519	0.0105928	0.417128	0.353801	0.193477	0.0248783
	180	0	79.1845	108.131	67.3276	78.8079	0.0478583	0.0164073	0.3749	0.192068	0.138058	0.0154277
	210	0	71.03	71.7233	65.6897	71.2748	0.236994	0.0417378	0.813855	0.969553	0.531618	0.033521
AD05	0	0	71.9833		53.8568		0.544726	0.217037	0.228691	0.650143	0.0678974	0.0247167
	30	0	76.6428		56.4976		0.537732	0.228608	0.193757	0.537335	0.0541956	0.0256052
	60	0	72.1625		50.4517		0.360386	0.133734	0.141492	0.48241	0.0617194	0.0332787
	90	0	86.3202		67.9639		0.47149	0.577363	0.180375	0.456976	0.0537674	0.0336018
	120	0	74.6117		58.3739		0.466594	0.382433	0.139244	0.529308	0.0486904	0.0248783
	150	0	72.1027		65.4621		0.397354	0.275297	0.0926281	0.397488	0.0376188	0.0340864
	180	0	65.5914		66.9215		0.280256	0.145766	0.0776014	0.291187	0.0280153	0.0210011
	210	0	72.7001		64.0723		0.205921	0.13713	0.0916409	0.395545	0.0244675	0.0226166
AD06	0	0	132.797	103.424	83.8264	81.25	0	0.0153135	0.00257757	0.0203645	0.292999	0
	30	32	134.282	102.518	84.6154	79.625	0.009192	0.0198614	0.00608746	0.0247585	0.182711	0
	60	0	118.936	107.251	71.0059	75.5	0.00239791	0.0181344	0.00427767	0.012844	0.125151	0
	90	128	116.46	108.258	76.7258	86.625	0	0.0137591	0	0.022477	0.0935883	0
	120	112	114.233	94.5619	73.7673	70.625	0.0239791	0.0188828	0.00756819	0.0154635	0.101296	0
	150	32	136.262	95.4683	83.6292	87.5	0.00719374	0.0174435	0.00723914	0.0163085	0.098176	0
	180	0	130.074	86.5055	79.2899	82	0	0.0141621	0.00669072	0.0107315	0.0808652	0.00113083
	210	0	116.832	111.48	71.2032	76.5	0	0.010823	0.00367441	0.0171535	0.0765834	0
AD07	0	0					0.0819848	0.0203	0.0525487	0.261654	0.0378191	0
	30	32					0.0611912	0.061	0.0750789	0.506159	0.0119569	0.00865
	60	700					0.0874568	0.0708	0.0624789	0.757455	0.010584	0.0045
	90	80					0.0112771	0.02105	0.0292371	0.610554	0.0237809	0
	120	64					0.0672817	0.0449	0.0407301	0.421878	0.0376863	0.00865
	150	48					0.115911	0.08095	0.0530045	0.338156	0.0120011	0
	180	16					0.0696133	0.05545	0.0405999	0.255293	0.0322392	0.0049
	210	0					0.0425388	0.05685	0.045679	0.260021	0.0651428	0.0023
AD08	0	0	107.302	87.3112	90.3353	84.25	0.0483439	0.0907	0.0293999	0.212314	0.127938	0
	30	1840	92.203	82.2759	94.8718	97.375	0.0401597	0.08495	0.0227906	0.368928	0.220981	0
	60	0	91.4604	74.6224	102.761	91.625	0.0292633	0.08425	0.0232465	0.249319	0.19534	0
	90	0	80.8168	81.4703	108.284	87.125	0.0203178	0.05995	0.00683719	0.161643	0.180726	0
	120	0	95.7921	97.281	113.215	97.25	0.0349732	0.05345	0.0134139	0.137661	0.220848	0.00515
	150	64	84.901	88.2175	105.523	90.25	0.0346877	0.0736	0.0201534	0.165855	0.220803	0.00685
	180	0	97.401	81.4703	94.2801	88.625	0.0297391	0.0868	0.0134465	0.108263	0.108232	0
	210	48	95.5446	77.8449	113.018	94.875	0.0200323	0.07975	0.0220092	0.0898683	0.126477	0.0009
AD09	0	0	67.7419	90.0322	88.6538	37.7184	0.0252663	0.17365	0.0250697	0.143033	0.0302022	0.00035
	30	0	68.5161	100.322	91.7308	82.1747	0.0330699	0.15585	0.030865	0.104954	0.0432661	0.0108
	60	0	58.0645	25.1125	105.769	35.3832	0.0159402	0.13065	0.0289441	0.117761	0.0381291	0.00525
	90	0	76.2581	71.7042	99.4231	54.0107	0.0570039	0.209	0.0518324	0.171914	0.0571272	0.00925
	120	0	83.2258	76.3666	88.0769	70.9447	0.0496762	0.279	0.0418697	0.15382	0.0457904	0.00795
	150	96	78.7097	76.045	98.8462	70.5882	0.0235058	0.22595	0.0412511	0.128377	0.0441518	0
	180	0	84.7742	93.0868	87.5	80.2139	0.0175104	0.1848	0.0388092	0.0982491	0.0237366	0.0002
	210		92	95.3376	97.1154	77.5401	0.0111819	0.142	0.0250046	0.0910717	0.0213452	0
AD10	0	0	75.3559	75.8163	80.3954	81.8856	0.0194137	0.01825	0	0.0755134	0.0480489	0
	30		69.0391	77.551	87.1499	83.4746	0.0122287	0.0189	0	0.0665309	0.0263494	0
	60	0	73.3096	70.2041	80.2306	76.6949	0.0173676	0.0336	0.00651161	0.0470616	0.0477832	0
	90		66.3701	67.8571	76.771	78.6017	0.0111343	0.0218	0.00149767	0.0248846	0.0207252	0.00955
	120	0	80.694	68.7755	75.6178	74.7881	0.0290729	0.0318	0.00224651	0.0654994	0.0709883	0.0001
	150	32	62.4555	66.1224	81.3839	71.6102	0.0095641	0.01945	0.0104837	0.0593535	0.0392805	0
	180	0	62.3665	74.1837	82.2076	74.0466	0.0110392	0.02385	0.00608836	0.0389386	0.0406976	0.00215
	210	0	38.5231	47.1429	68.0395	72.3517	0.0365434	0.06425	0.0275441	0.0892236	0.067047	0.00295
AD11	0	0	81.4947	82.2449	73.8056	57.3093	0.0278358	0.0242	0.00693487	0.0790377	0.0521231	0.01455
	15	14000	67.1708	70.2041	66.2273	49.1525	0.0144651	0.1135	0.00475348	0.111272	0.0372877	0.0248
	30	0	73.4875	80.2041	86.6557	67.9025	0.00904069	0.03205	0.0102232	0.0445688	0.0317521	0.00885
	60	0	66.1032	79.3878	72.1582	59.9576	0.017558	0.0256	0.0115581	0.0296552	0.0170939	0.00845
	90	0	78.1139	70.8163	71.9934	70.9746	0.0373047	0.01545	0.00361394	0.0288816	0.0269694	0.00835
	120	16	71.7082	73.3673	80.5601	69.1737	0.0154168	0.02015	0.00680463	0.0293544	0.0262165	0.0106
	150	0	59.9644	71.9388	80.5601	69.5975	0.00342594	0.00485	0.00182325	0.0174923	0.0190867	0
	180	16	64.2349	75.5102	87.1499	75.7415	0.00499617	0.00275	0	0.0224348	0.0158539	0
	210	0	61.3879	78.2653	79.9012	54.4492	0.0153216	0.14215	0	0.0818313	0.00717412	0.0027
AD12	0	0	44.8015	91.0212	10.5591	12.6139	0	0.345692	0.3802	0.551327	0.325708	0
	30	0	82.2306	94.5168	70.9648	98.581	0	0.262605	0.634001	0.503714	0.277735	0
	60	0	62.7599	94.4483	71.3255	84.6901	0	0.262343	0.562851	0.51451	0.260945	0
	90	0	35.3875	81.4942	63.3003	100.597	0	0.226817	0.548095	0.516346	0.271993	0
	120	48	25.8979	93.7629	10.0902	27.8566	0	0.253867	0.552632	0.402874	0.268141	0.000676815
	150	0	81.0964	98.8348	69.2516	81.1053	0	0.243821	0.490507	0.428192	0.299541	0
	180	0	96.5974	102.399	88.6384	113.518	0	0.220015	0.383734	0.395532	0.282314	0
	210	0	27.7316	88.074	53.2011	93.7267	0	0.20887	0.377096	0.461985	0.291691	0
AD13	0	32	49.9055	63.9479	37.2408	58.4765	0.509958	0.380382	0.098703	0.689739	0.392144	0.0483
	30	0	47.6371	62.3029	39.5852	54.0702	0.553747	0.54122	0.127545	0.747932	0.384584	0.0352559
	60	0	60.1134	65.7985	44.0036	55.7879	0.500361	0.430402	0.0817511	0.67878	0.350422	0.122011
	90	128	42.344	65.5243	36.339	57.8043	0.512566	0.385771	0.168516	0.667768	0.325854	0.021535
	120	240	57.656	64.976	38.6835	61.3891	0.668391	0.457348	0.241338	0.641856	0.370919	0.0436853
	150	30	51.2287	65.5929	39.5852	61.3144	0.633406	0.376039	0.347299	0.731791	0.357763	0.0148284
	180	0	60.4915	74.0918	57.2588	60.6423	0.539399	0.252507	0.20242	0.685798	0.220458	0.0159359
	210	0	59.9244	73.4064	48.963	58.6258	0.486153	0.18815	0.111357	0.589816	0.230707	0.00633745
AD14	0	0	33.4623	51.322	59.4814	51.0783	0.0720658	1.04728	0.864642	1.0301	1.03804	0
	15		56.2863	61.8983	60.0486	45.3462	0.0580905	0.999615	0.63424	0.802185	1.11872	0
	30	0	55.8994	64.2034	58.8331	54.0863	0.0326555	0.921916	0.623543	0.877923	1.1885	0
	60	0	46.2282	54.4407	58.752	61.521	0.0357301	0.868495	0.493945	0.894711	1.21794	0
	90	32	51.6441	57.2881	52.5932	50.0568	0.0262735	0.841706	0.507793	0.796841	1.01718	0.00972152
	120	0	54.1586	50.1017	57.9417	57.2077	0.0406214	0.770234	0.389273	0.621774	0.966876	0
	180	0	60.1547	57.6271	58.2658	59.4211	0.0194256	0.570521	0.316404	0.582529	0.58251	0
	210		57.6402	72.8136	80.2269	70.3178	0	0.0685943	0.252082	0.434292	0.187313	0
AD15	0	0	48.7728	58.7314	94.9074	42.8661	0.0463513	0.469696	0.74722	0.876087	0.299178	0.00707579
	30	0	50.9897	61.6288	113.426	51.1264	0.0268791	0.289394	0.493229	0.673112	0.246916	0
	60	0	55.3444	65.6226	88.9352	60.5757	0.0139753	0.20887	0.39486	0.526818	0.209555	0
	90	32	54.1568	59.0446	120.37	55.2566	0.0224536	0.219125	0.545374	0.637915	0.249387	0
	120	0	59.3032	71.0258	110.648	65.2065	0.0203107	0.16921	0.51209	0.596888	0.25135	0
	150	0	56.2154	72.5137	99.537	67.9599	0.00917709	0.125573	0.423654	0.436019	0.227872	0
	180	0	58.3531	67.9718	82.4074	70.8385	0.0115063	0.0948077	0.331636	0.412591	0.175974	0
AD16	0	0	0.918448	84.8865	54.9074	6.50206	0.00270189	0.16471	0.124823	0.271372	0.145882	0
	30	0	73.8717	70.6343	91.1574	88.8889	0.00927026	0.163454	0.0942621	0.270778	0.167688	0.00381477
	60	0	58.8282	74.2365	87.4537	82.9218	0	0.13902	0.0901077	0.251884	0.117098	0
	90	0	2.09818	67.9718	57.6852	10.535	0.00479818	0.13248	0.0814646	0.230939	0.0997259	0
	120	0	66.1916	65.1527	96.2963	85.5967	0	0.111969	0.0612178	0.210695	0.0958008	0
	150	0	65.6374	77.8387	78.9815	82.3045	0.00694105	0.129131	0.0790293	0.220358	0.066072	0
	180	0	62.312	60.4542	80.8796	82.7846	0.011879	0.11694	0.0700519	0.183002	0.0751579	0
	210	0	55.4236	71.9655	83.3333	74.0741	0.00400624	0.103493	0.0543416	0.173555	0.0620743	0
AD17	0	0	71.5857	89.6648	71.284	59.6463	0.01055	0.0216187	0.530021	0.343528	0.119407	0
	30	1782	68.1027	86.1266	86.6926	63.746	0.0024	0.0227233	0.377386	0.252688	0.0845779	0
	60	0	75.3437	88.4544	71.3619	60.3698	0.00085	0.0178315	0.74919	0.6248	0.125188	0
	90	32	68.1943	76.4432	56.1089	59.4855	0.0154	0.0239858	0.851117	0.311498	0.0798221	0
	120	16	5.27039	85.7542	10.8249	4.8955	0	0.0168847	0.773109	0.285195	0.0926906	0
	150	0	67.736	90.8752	70.6615	64.3891	0.00225	0.0203563	0.587028	0.188787	0.0760455	0
	180		65.5362	86.9646	72.7626	60.2894	0.00305	0.0130975	0.464255	0.164499	0.0582347	0
	210	80	77.8185	89.851	70.8949	64.1479	0	0	0.344094	0.12059	0	0
AD18	0	0	91.5547	82.9897	98.1938	83.56	0	0.0107831	0.0427684	0.118787	0.208228	0
	30	0	107.869	78.866	92.775	84.3016	0.0053	0.0152015	0.0289391	0.0643784	0.154189	0
	60	0	86.9482	69.8969	54.6798	88.8752	0.0031	0.0197251	0.0291952	0.0732875	0.136145	0
	90	16	83.8772	77.2165	56.8144	89.3696	0.00955	0.0126767	0.0271464	0.0712723	0.154282	0.00116111
	120	0	82.3417	77.2165	59.6059	93.6959	0.00535	0.00604904	0.0273001	0.0657572	0.141041	0
	150	16	92.8983	75.1546	59.1133	77.3795	0	0.00783745	0.0174147	0.056477	0.131296	0
	180	0	107.294	74.7423	57.9639	89.3696	0	0.00452363	0.0126513	0.0546739	0.114371	0
	210		106.334	79.4845	64.532	93.4487	0	0.0281412	0.0252001	0.514391	0.17932	0
AD19	0	336	58.3493	118.041	93.9245	126.7	0.49985	0.0106779	0.187822	0.325869	0.56435	0
	30	2360	67.9463	96.8041	79.3103	107.417	0.37535	0.0179367	0.139164	0.348354	0.516279	0
	60	0	2.91747	32.9897	66.9951	47.0952	0.3208	0.0417647	0.0874319	0.322688	0.520942	0
	90	0	80.6142	91.8557	69.7865	97.157	0.2529	0.0127819	0.0951661	0.2004	0.602443	0
	120	0	61.9962	83.299	76.6831	100.371	0.1963	0.00736405	0.0826685	0.13178	0.58701	0
	150	0	71.2092	75.4639	63.8752	90.1112	0.09965	0	0.046405	0.108712	0.573908	0
	180	0	73.5125	72.7835	66.1741	85.2905	0.0672	0	0.0155708	0.0337271	0.275461	0
	210	0	77.5432	60.7216	48.7685	71.8171	0.07805	0	0.00614636	0.0338331	0.350434	0
AD20	0	0	76.4706	83.5821	94.0299	86.8759	0.00915	0.198303	0.0657148	0.186825	0.20902	0.0102056
	30	0	57.3529	83.1557	84.6482	96.719	0.00575	0.143915	0	0.278938	0.266882	0
	60	96	78.4926	76.9723	85.0746	77.3181	0.01385	0.146913	0.0384147	0.215355	0.17186	0
	90	0	87.1324	73.4542	85.5011	83.0243	0.0158	0.112407	0.00537806	0.151507	0.128079	0.00354444
	120	0	79.4118	80.8102	83.1557	89.1583	0.0138	0.138023	0.0530123	0.190113	0.167011	0
	150	0	66.7279	77.9318	67.8038	82.311	0.01215	0.103623	0.0344708	0.16609	0.116423	0
	180	0	75.1838	68.6567	85.2878	80.8845	0.0152	0.0933656	0.0337537	0.142439	0.104207	0.000977778
	210	40704	69.1176	80.9168	90.8316	83.0243	0.0184	0.0652244	0.0364684	0.158295	0.109429	0.000488889
AD21	0	0	48.8971	73.9872	84.8614	79.1726	0.19075	1.0054	0.271208	0.912116	0.132089	0
	30	0	45.9559	69.6162	93.3902	86.3053	0.1759	0.971844	0.478084	1.09597	0.208228	0
	60	78	52.0221	66.8443	71.6418	70.8987	0.1477	0.922978	0.278891	0.841427	0.120852	0
	90		50.3676	44.4563	71.2154	67.475	0.1404	0.887631	0.173225	0.860518	0.0826662	0
	120	0	53.125	64.6055	76.3326	66.7618	0.0975	0.881371	0.185108	0.871018	0.0871423	0
	150	0	46.6912	66.6311	75.9062	73.4665	0.0658	0.679701	0.14531	0.753503	0.0766982	0
	180	0	47.0588	60.7676	80.1706	74.6077	0.0976	0.740139	0.117959	0.562967	0.0531992	0
	210	32	55.6985	64.8188	64.3923	79.7432	0.10795	0.797947	0.0696075	0.551459	0.0506814	0
AD22	0	0	78.7945	101.601	83.5115	96.1883	0.183308	0.680754	0.888159	0.77992	0.862925	0.00278066
	30	0	67.1024	103.013	82.5954	94.843	0.317492	0.902773	1.07836	0.812751	0.890646	0
	60	0	68.9179	103.013	94.6565	101.121	0.244542	0.907728	0.924495	0.859805	1.00475	0.000432547
	90	96	59.4771	97.3635	90.3817	104.26	0.180109	0.965796	0.677068	0.79703	0.887491	0.0120495
	120	0	71.5323	103.296	77.8626	105.157	0.19527	1.01196	0.773503	0.797565	1.02133	0.00747689
	150	0	76.9063	108.192	84.5802	94.1704	0.187542	0.941866	0.666785	0.613199	0.835203	0.0134708
	180	0	77.1242	109.793	86.1069	90.583	0.156974	0.75932	0.688523	0.701247	0.788217	0.0182906
	210	0	81.0458	109.322	83.0534	86.7713	0.133888	0.705404	0.613293	0.661037	0.478985	0.0241608
AD23	0	9751	32.0261	53.484	71.6031	120.404	0.139795	1.17867	0.744466	0.924468	1.53764	0.128837
	30	80	33.1881	51.0358	73.4351	115.471	0.205656	1.28358	0.949483	0.942933	1.52952	0.163688
	60	720	30.6463	56.6855	75.7252	122.422	0.17686	1.20916	0.91629	0.930992	1.61751	0.0981264
	90	464	29.7749	57.1563	73.7405	106.502	0.139746	1.15355	0.888319	0.941686	1.33305	0.105974
	120	32	27.451	51.8832	70.5344	115.919	0.167311	1.09366	0.885921	0.940723	1.47031	0.0661179
	150	2096	31.3725	49.7175	56.7939	109.641	0.135955	1.18074	0.954065	0.821128	1.45286	0.0722972
	180	16	20.3341	44.162	55.8779	100.448	0.0513894	0.902434	0.533375	0.699251	1.33949	0.0245934
	210	0	22.8032	46.6102	56.6412	113.677	0.025547	0.863596	0.462141	0.659932	1.06832	0.0281156
AD25	0	1569	23.2855	40.1732	39.2554	26.9565	0.0491251	1.19091	0.851556	1.00421	1.41829	0
	30	3160	35.6459	46.5023	48.661	36.996	0.0261869	1.02598	0.716015	0.920119	1.22075	0
	60	272	25.8373	49.9001	44.9379	36.6798	0.0225444	0.994257	0.632154	0.913382	1.30768	0
	90	64	24.9601	35.976	30.0457	16.5692	0.0271714	1.0151	0.737966	0.892172	1.16182	0.0107519
	120	0	39.3939	55.8961	39.7779	38.0237	0.0271222	1.09057	0.646379	0.903508	1.23928	0
	150	48	37.0016	49.3005	44.9379	30.5929	0.0316015	1.03513	0.669716	0.919014	0.99784	0.00784764
	210	0	45.933	60.2265	64.0105	48.5375	0.00807266	0.756229	0.370235	0.808651	0.855675	0.00278066
AD26	0	0	13.3333	55.9627	16.7864	3.49407	0.157811	0.96605	0.0905208	0.614161	1.15914	0.0486307
	30	0	51.1962	61.3591	50.9471	40.0791	0.0802836	1.00955	0.0505084	0.709374	1.11181	0.0240991
	60	0	51.3557	62.8914	48.2691	44.9802	0.0203293	0.946016	0.0427297	0.576304	0.885075	0
	90	0	43.5407	56.4957	52.1881	31.6206	0.0151116	0.829289	0.0330329	0.758603	0.73895	0
	120	0	49.2026	58.7608	56.3031	43.6364	0.0453349	1.07155	0.0492297	0.943896	0.919643	0.0127292
	150	0	44.7368	57.495	48.5957	36.917	0.0375575	1.17062	0.0361764	1.00557	1.00509	0.00914528
	180	0	43.9394	54.2971	52.1228	44.8221	0.0400187	1.04568	0.0400657	0.771828	1.11094	0.00469623
	210	16	45.3748	55.6296	41.9334	44.664	0.0186557	0.849577	0.0165165	0.677613	0.89125	0
AD27	0	0	43.8155	38.9435	36.8805	29.7801	0.0175236	0.252895	0.124406	0.238371	0.381456	0
	30	0	51.782	47.113	42.5143	38.3744	0.0298787	0.115499	0.0699019	0.180338	0.312522	0
	60	0	54.9266	51.4128	45.1226	40.2398	0.0234796	0.138836	0.0531723	0.155243	0.24258	0
	90		50.3843	48.2801	48.1481	42.1053	0.018508	0.0703074	0.0470452	0.113286	0.171699	0
	120	0	50.594	53.0713	50.8607	44.5037	0.0154562	0.0684015	0.0453936	0.153817	0.160087	0
	150	0	53.8784	54.2383	55.8685	49.6336	0.0258423	0.0618367	0.0189673	0.175205	0.134312	0
	180	0	59.7484	59.7666	61.4502	55.8961	0.00201816	0.0496811	0.0189673	0.142623	0.0977301	0
	210	2768	57.7219	67.3833	63.9019	63.2911	0.014324	0.0476905	0.0239755	0.164083	0.103771	0
AD31	0	0	23.1418	76.7416	63.978	56.4494	0.0409982	0.966454	0.487726	0.647562	0.377077	0.0852282
	30	0	20.3065	66.6292	46.1962	61.5811	0.00710313	0.87872	0.324828	0.540326	0.292871	0.0557645
	60	0	18.4802	64.1573	49.4042	64.2164	0	0.717645	0.277148	0.426968	0.199251	0.0305179
	90		18.9911	69.2135	34.8304	64.6325	0.00344812	0.371135	0.22048	0.455604	0.185041	0.0295746
	120	0	20.2171	57.9775	43.7214	69.9029	0.000758587	0.583593	0.248249	0.432537	0.235942	0.0170345
	150	0	18.8378	84.9438	50.2291	58.2524	0	0.467556	0.133246	0.374081	0.276857	0
	180	0	21.3282	73.8202	54.7204	67.8225	0	0.384887	0.0940688	0.307488	0.273558	0
	210	0	28.2248	70.4494	59.3951	67.129	0	0.327535	0.0872881	0.285607	0.17281	0
AD34	0	16	102.725	70.2703	80.5425	71.952	0.120788	0.153933	0.24685	0.447388	0.275713	0.0134279
	15		102.236	82.9238	80.5425	58.4943	0.107892	0.0951423	0.217036	0.355754	0.279717	0.0200863
	30	0	98.0433	72.4816	71.4137	57.5616	0.103926	0.0986069	0.162844	0.327395	0.301142	0.00649199
	90	64	94.7589	74.0172	78.3516	63.2911	0.113581	0.0497298	0.161445	0.319772	0.215573	0.0155919
	120	32	80.6429	74.6314	69.1706	63.3578	0.108685	0.129095	0.218758	0.363496	0.292563	0.0266338
	150	0	93.501	67.7518	74.5957	65.6229	0.0904442	0.0475978	0.230921	0.331345	0.297799	0.0218064
	180	0	99.2313	73.0344	73.5003	49.4337	0.101409	0.0523949	0.151651	0.29161	0.292211	0.019476
AD35	0	0	75.4881	79.7674	77.3967	82.1651	0.145062	0.0898122	0.074803	0.921833	0.220764	0
	30	0	72.0174	82.2093	76.4614	75.0779	0.164406	0.183196	0.0851355	0.942332	0.386007	0
	60	0	60.5206	82.093	75.3702	77.1028	0.138614	0.148017	0.165051	0.795283	0.323491	0
	90		66.8113	79.3023	78.4879	81.1526	0.118822	0.135491	0.104832	0.792715	0.275053	0
	120	0	68.2213	74.0698	77.9423	82.3988	0.125408	0.150309	0.134807	0.785764	0.175494	0
	150	80	73.7527	76.3953	82.463	88.2399	0.131339	0.236923	0.0736729	0.897344	0.314648	0
	180	0	67.3536	75.1163	83.0865	83.8785	0.121098	0.16001	0.138843	0.720316	0.243421	0
	210	0	75.1627	84.5349	86.2822	88.785	0.11696	0.149403	0.0844359	0.739512	0.215177	0
AD36	0	0	68.2213	93.1395	72.5643	75.4673	0.0526873	0	0.0615107	0.226005	0.079498	0.00194205
	30	0	75.4881	87.2093	66.5627	69.081	0.0656177	0.0144446	0.162683	0.277233	0.113946	0.015259
	60		71.2581	85.814	65.8613	72.5078	0.0593766	0	0.496767	0.358282	0.117245	0
	90		69.6312	84.3023	64.848	66.2773	0.064204	0	0.337313	0.288371	0.0948961	0.00105425
	120	32	61.2798	81.5116	66.173	74.6885	0.0475496	0	0.174199	0.259222	0.0819617	0
	150	0	59.8698	88.7209	78.0982	77.8816	0.051446	0.000692913	0.187061	0.202859	0.0923004	0.00405056
	180	0	61.9306	72.907	76.1496	75.3894	0.0418257	0	0.0975668	0.163836	0.0934003	0
	210	0	71.9089	76.5116	82.5409	84.4237	0.0461014	0	0.0286834	0.140058	0.0723709	0.00122072
AD38	0	0	85.6833	113.488	79.1115	79.7508	0.229024	0.113318	0.0245935	0.483094	0.0153981	1.03833
	30	0	78.6334	109.419	75.0585	84.3458	0.340123	0.129895	0.0522006	0.480171	0.032204	1.12961
	60	0	80.6941	124.767	78.41	79.2835	0.333882	0.0813373	0.0143686	0.389801	0.0289484	0.975297
	90		77.5488	102.674	84.9571	88.7072	0.2403	0.055433	0.00651163	0.345327	0.0349316	0.820599
	120	96	89.154	124.884	82.1512	83.4112	0.238851	0.104097	0.0108168	0.319179	0.0191816	0.824039
	150		83.9479	114.767	86.9836	83.6449	0.250644	0.108414	0.0322352	0.306975	0.0332598	0.817769
	180		3.27549	5.7907	4.38036	2.86604	0.211163	0.0482907	0.000430521	0.277154	0.0177298	0.581005
	210		87.6356	115.814	85.2689	87.3053	0.176992	0.043387	0.00209879	0.201674	0.0298283	0.451055
AD39	0	0	73.5273	78.3784	65.9496	85.0095	0.0941528	0.0262083	0	0.385829	0.0658904	0.00081174
	30		67.1273	72.6351	65.6528	70.019	0.00215206	0.00148973	0.001	0.001103	0.00295514	0.000357165
	60	240	72.8	78.8288	57.4184	72.6755	0.0759947	0.0233392	0	0.333657	0.0751714	0
	90		69.6	81.5315	62.4629	78.3681	0.0671847	0.0364157	0	0.297975	0.0682453	0
	120	32	69.8909	79.8423	62.7596	78.1784	0.0917317	0.0267049	0	0.277239	0.0669986	0
	150		66.0364	88.7387	64.2433	67.1727	0.14782	0.0340983	0	0.273488	0.0836675	0
	180	0	61.1636	80.9685	61.276	73.4345	0.107872	0.0224564	0	0.26312	0.0863917	0.000844209
	210	0	82.6909	92.3423	70.549	93.5484	0.0930095	0.0262634	0	0.321855	0.079835	0
AD40	0	0	75.0545	78.9414	80.2671	82.1632	0	0.00535201	0	0.0226666	0.0278892	0
	30	0	79.0545	70.8333	83.0119	83.871	0	0.0397262	0	0.149677	0.0464511	0
	60	0	70.1091	74.3243	72.5519	79.8861	0	0.0502647	0.00135	0.19297	0.0675989	0.00227287
	90	0	68.2909	82.545	72.5519	88.2353	0	0.0153387	0	0.0585692	0.042157	0
	120	0	74.1818	74.7748	59.7923	82.7324	0	0.0146766	0	0.0400388	0.0390633	0
	150	0	67.4909	73.7613	76.1869	77.9886	0	0.00733832	0	0.0211776	0.0347691	0.000324696
	180	0	72	78.0405	71.6617	80.4554	0	0	0	0.0185855	0.0220712	0
	210	0	33.6	53.9414	42.8783	33.3207	0	0	0	0.0171516	0.00812664	0
AD41	0	128	86.1156	67.2546	89.1059	69.3451	0.00671661	0.0935785	0.618314	0.551577	0.238458	0.00478097
	30	0	93.74	73.1922	90.5447	69.5102	0.0241039	0.0745405	0.468716	0.387771	0.205339	0.0113653
	60	0	88.764	74.1917	94.3474	72.9224	0.0145165	0.051171	0.401581	0.373258	0.16412	0
	90	0	92.4559	81.1287	90.7503	69.7303	0.0203123	0.043163	0.444308	0.266544	0.108789	0.00331313
	120	0	95.5056	79.4827	84.7893	76.6098	0.0166832	0.0488542	0.311267	0.270137	0.10555	0.00620687
	150	0	85.0722	71.8989	90.2364	68.3544	0.00893742	0.0259884	0.235426	0.232921	0.086542	0.00385832
	180	0	88.122	77.1311	85.7143	75.8393	0.00487496	0.0244271	0.175181	0.183204	0.0654825	0.0039422
	210	15168	87.9615	76.4256	88.2837	74.2983	0.000649994	0.0192899	0.248458	0.263383	0.0664185	0
AD43	0	0	109.059	89.9611	95.515	64.1259	0.0117541	0.0230169	0.00368521	0.0688752	0.0194755	0
	30	0	100.232	88.7306	96.2348	50.5594	0.0164124	0.0133468	0.00272385	0.0523509	0.0160556	0
	60	0	94.7735	83.8083	90.9192	91.6783	0.017604	0.00740368	0.00128181	0.0440648	0.0179996	0
	90	32	93.2636	84.9741	94.2968	77.8322	0.0167915	0.00987158	0.00753064	0.0387004	0.0203395	0
	120	32	97.0964	93.2642	90.753	79.3706	0.0116457	0.0171745	0.00459316	0.0379341	0.0198715	0.00771665
	150	0	93.2636	76.2953	81.1185	83.2168	0.0110499	0.0151599	0.00320453	0.0315159	0.0170276	0
AD44	0	0	87.3403	69.0415	86.7663	72.5175	0.0295747	0.217225	0.00576815	0.0224156	0.0690464	0.00381639
	30	0	87.8049	74.7409	76.6888	84.0559	0.0283831	0.177084	0.008492	0.0180091	0.0521268	0.00113233
	60	0	85.482	74.0285	87.5969	90	0.0243206	0.143944	-0.00405907	0.0224156	0.043379	0
	90	0	101.278	95.0777	89.8117	81.4685	0.0181457	0.104558	0.00379203	0.0140337	0.0371511	0.00444546
	120		90.8246	69.8187	76.1351	67.7622	0.0135957	0.0952909	0.00560793	0.0140816	0.0376551	0.000209692
	150	0	51.9164	72.4093	77.021	66.7832	0.0137582	0.092269	0.00309771	0.0133152	0.0314993	0
	180	64	33.9141	70.7902	67.4972	77.4825	0.0132707	0.0905062	0.00416589	0.0219366	0.0496428	0.00494872
AD45	0		7.71196	68.1995	5.61462	7.53846	0.0135957	0.0225132	0.00945336	0.454874	0.0682544	0.00545198
	30	3120	104.646	81.9301	87.8184	82.7972	0.00893742	0.0144548	0.00806473	0.346723	0.0458269	0.00159366
	60	112	120.674	70.0777	71.8162	85.6643	0.0127832	0.0143037	0.010842	0.620883	0.0381591	0.00163559
	90	192	121.835	72.3446	78.3499	8.68531	0.0258914	0.0411987	0.0054477	0.677688	0.0377991	0.00486484
	120	0	98.6063	65.6736	56.2016	65.9441	0.0202581	0.0329892	0.00795792	0.549469	0.0303833	0.00524229
	150	0	91.0569	60.3627	73.7542	72.3077	0.0110499	0.0230169	0.00534088	0.756766	0.0279353	0.00293568
	180	32	99.7677	73.1218	77.8516	81.5385	0.0218831	0.0492572	0.0128181	0.701637	0.0193675	0.00163559
	210	0	91.7538	66.3212	72.5914	88.2517	0.0175498	0.0353564	0.00261703	0.544392	0.0260274	0.00729726
AD47	0	0	90.3485	92.7538	85.7921	80.936	0.0329872	0.0196928	0.0434748	0.297294	0.155048	0.0377864
	30	0	84.2717	92.9111	87.1782	83.0542	0.0243206	0.0122387	0.032793	0.201022	0.141405	0.0307408
	60	16	84.6291	99.9895	88.7624	90.6404	0.00817909	0.00438177	0.0235533	0.120699	0.107278	0.0354379
	90	0	92.4933	99.8846	93.6634	89.2611	0.0149499	0.0259884	0.00464657	0.102211	0.113361	0.0335087
	120	0	91.9571	97.4203	91.2871	89.3596	0.0179832	0.00659784	0.00929314	0.0711264	0.0828341	0.0278051
	150	0	80.3396	94.3268	92.1782	84.7291	0.0186332	0.0105767	0.0110022	0.0637024	0.0710623	0.0274276
	180		87.4888	97.5252	88.8119	83.9409	0.00774576	0.0120373	0.00683633	0.0526862	0.0406071	0.0202562
	210	0	97.6765	115.352	99.703	104.926	0.0133249	0.0223118	0.00512725	0.0512972	0.0523068	0.0325441
AD48	0	16	112.243	97.63	99.2079	87.3892	0.00471246	0.116797	0.110716	0.0315159	0.0465469	0.00390026
	30	18000	97.2297	95.1133	87.1782	88.7192	0.00297914	0.127928	0.0881246	0.0385567	0.0470149	0.0126234
	60	0	103.485	104.289	94.4554	83.7931	0.00222081	0.151549	0.131119	0.0384609	0.044855	0
	90	32	95.9786	91.0235	87.0792	90.6404	0	0.064266	0.0930916	0.0291211	0.0381591	0
	120	0	95.6211	99.6749	86.1881	91.0345	0.00222081	0.103954	0.0662269	0.0323781	0.0535668	0
	150	0	100.268	94.3792	92.5248	81.7734	0.00574161	0.0427097	0.0547975	0.0253373	0.042335	0.00675207
	180	0	86.4164	83.6829	86.9802	80.6404	0.000270831	0.0316797	0.0540497	0.030558	0.0401751	0.003397
	210	6464	78.5523	94.8511	87.5248	81.6256	0.00129999	0.031579	0.046252	0.0244272	0.0272514	0.00280987
AD49	0	0	77.1224	85.7278	82.2772	84.5813	0.00433713	0.00236345	0.00291266	0.0188949	0.0278371	0.00513865
	30	48	81.5907	91.0759	80.1485	91.5271	0.0071156	0.00339746	0.0146798	0.0351735	0.0321526	0.00156772
	60	32	96.6041	88.297	91.4851	82.7586	0.00806435	0.00564273	0.0137477	0.0354061	0.0341444	0.00378867
	90	32	80.8758	78.125	87.8713	81.8719	0.0152477	0.00443146	0.00320392	0.0305806	0.0223361	0.0020032
	120	64	74.2627	86.9862	82.2772	71.6749	0.0103007	0.00570182	0.0108933	0.00674401	0.0394083	0.00505156
	150	0	75.6032	79.3834	80.099	78.867	0.00338838	0.00649948	0.0203303	0.0130811	0.034998	0.00195966
	180	0	83.378	81.3234	80.297	86.8966	0.00447266	0.00416558	0.00809718	0.0128485	0.0422537	0.000958054
AD50	0	0	89.8846	110.479	81.0738	47.7766	0.0164703	0.0185618	0.0377575	0.171629	0.064007	0.0214976
	30	176	114.197	107.725	98.0477	89.7622	0.0136272	0.0175272	0.0473164	0.101722	0.0735951	0.0179758
	60	128	129.814	104.85	95.5531	88.5729	0.0305877	0.0275079	0.0820697	0.453867	0.101841	0.0155546
	90	0	131.145	118.084	102.549	84.0745	0.0305877	0.0398013	0.0489551	0.305167	0.144275	0.0158481
	120	0	115.262	98.6826	100.542	93.0714	0.0400974	0.0243433	0.0492282	0.131549	0.189753	0.0304488
	150	0	107.897	100.12	94.1432	88.3144	0.0215683	0.0169186	0.0368017	0.0690991	0.17129	0.0203237
	180	0	101.508	106.108	94.9566	51.0858	0.080979	0.0219698	0.0903996	0.135526	0.257259	0.0441691
AD51	0	0	8.4472	97.485	9.41432	2.66805	0	0.0596827	0.0413114	0.115677	0.0125744	0.0852756
	30	0	87.8438	93.6527	99.6204	88.8831	0	0.0210119	0.0158939	0.122449	0.000151499	0.0509285
	60	16	90.6832	89.8802	91.1063	89.607	0	0.0139148	0.00706394	0.0830614	0.00477221	0
	90	0	90.0621	107.485	91.6486	89.09	0	0.0157589	0	0.0756064	0	0
	120	16	86.1579	99.0419	94.8482	95.4498	0	0.0529209	0.0211918	0.0477122	0.0159831	0.0547448
	150	0	90.417	92.8743	95.7701	94.2606	0	0.0157589	0	0.0531171	0	0.0201345
	180	0	87.4002	91.1377	95.0108	93.6401	0	0.0150325	0	0.0455999	0.00181798	0.0073695
AD53	0	0	117.569	105.868	98.4273	86.8149	0	0.0528651	0.0236427	0.0843	0.283211	0.0103625
	30	0	100.532	106.467	95.9328	94.9845	0.00385665	0.054211	0.0170227	0.0556	0.23438	0.0105251
	60	0	101.065	112.754	97.6139	95.5016	0	0.0464719	0.00945707	0.0648	0.275809	0.00597369
	90	0	103.549	109.401	103.688	92.8128	0	0.0412004	0.000827494	0.07285	0.193945	0
	120	0	92.9902	107.784	100.813	91.5202	0.001458	0.0342464	0.00992992	0.07145	0.270451	0.01849
	150	48	4.685	106.108	4.54447	1.71665	0.00141097	0.0398918	0.00981171	0.0572	0.270617	0.0189776
	180	0	104.525	105.808	92.5163	91.6236	0	0.0266195	0	0.05395	0.227199	0.00690835
	210	32	114.463	102.455	90.6182	88.2627	0.00498543	0.0677077	0.0682682	0.1647	0.285531	0.00759918
AD54	0	6208	66.9689	67.9446	68.3888	78.5482	0.00272788	0.0308068	0.179211	1.0689	0.118543	0.00308844
	30	16	72.9275	67.1459	68.8266	71.831	0.00917131	0.053239	0.205928	1.05685	0.148428	0.011541
	60	0	68.7176	65.8679	66.3748	70.8559	0.0428465	0.127938	0.233826	1.08105	0.156437	0.0399871
	90	1120	72.6684	65.8679	75.7443	72.6977	0.0595429	0.0666235	0.233826	1.10535	0.13622	0.015239
	120	0	72.3446	67.4654	69.965	80.9317	0.0688083	0.0582862	0.26267	1.02115	0.111694	0.0575425
	150	128	68.7176	62.0873	65.5867	70.6392	0.0748284	0.0651654	0.232053	0.9403	0.107882	0.0362891
	180	0	65.544	67.4654	64.1856	78.2232	0.0165084	0.0322649	0.194697	0.86625	0.0907579	0.0259673
	210	16	78.4974	63.6848	77.6708	81.7985	0.0190951	0.0286384	0.200608	0.95775	0.0859521	0.0220254
AD55	0	0	103.562	89.2971	98.3363	89.4908	0.00240371	0.044902	0.571219	0.920911	0.444937	0.0221716
	30	128	111.399	88.3387	90.9807	94.2579	0	0.0197873	0.558945	0.82198	0.442816	0.0111015
	60	0	92.4223	83.5996	85.9019	95.1246	0.0175908	0.0526647	0.616301	0.869029	0.423683	0.0348054
	90	208	98.1865	82.6411	89.0543	86.9989	0.0138213	0.0410967	0.552021	0.88342	0.313423	0.0121021
	120	0	69.5596	82.1619	80.9107	75.8397	0.0075389	0	0.00601735	0.0667504	0.00572012	0
	150	0	106.153	89.8296	94.5709	85.6988	0.00786668	0.0299854	0.705511	0.903068	0.526843	0.0113829
	180	880	91.6451	83.6528	84.1506	74.3229	0	0.0292243	0.587552	1.07507	0.461752	0.00612925
AD56	0	32	70.5311	72.2577	72.1541	63.8137	0.0927613	0.00162357	0.355836	0.299235	0.208686	0.0940965
	30	16	77.1373	64.2705	62.0841	58.1798	0	0.258148	0.117911	0.367472	0.0393998	0
	60	0	76.1658	73.3759	72.8546	87.7573	0.0199399	0.00974144	0.234534	0.2105	0.146997	0.065264
	90	224	70.4016	71.6187	73.6427	71.9393	0.109478	0.00466778	0.391319	0.361153	0.198429	0.10057
	120	0	71.8912	74.0149	74.0806	64.6804	0.147118	0.00273978	0.609711	0.334973	0.153013	0.0416226
	150	32	51.6839	70.181	66.8126	58.8299	0.105272	0	0.696485	0.24576	0.150893	0.0389333
	180	0	70.2073	69.0628	63.1349	64.3554	0.068615	0	0.407556	0.0757778	0.0907822	0
	210		70.013	72.4175	73.2049	73.4561	0.0944002	0	0.417108	0.0952135	0.100694	0.0218589
AD58	0	0	75.8152	78.0272	69.2229	83.2344	0.0164436	0	0.00234008	0.00334548	0.0137086	0
	30	0	70.7201	79.4448	76.7894	92.73	0.0447418	0.00882818	0	0.0412079	0.0113416	0.00809937
	60	27	73.8451	82.3981	77.5051	79.0801	0.328871	0.0159821	0.000334297	0.0981342	0.0394491	0.0396212
	90	0	75.3397	83.4022	91.2065	90.8012	0.108276	0.00542883	0	0.0246929	0.0117361	0
	120	0	77.5815	85.4696	74.6421	80.4154	0.0586177	0	0	0.0132757	0.00848156	0
	150	32	72.0109	70.0532	64.2127	74.3323	0.0329964	0.00669724	0	0.00414203	0.0149413	0
	180	0	65.7609	73.5381	73.1084	75.3709	0.0313575	0.0119739	0.00525325	0.00270825	0.00527632	0
	210	0	78.7364	83.8748	73.4151	71.2166	0.0281343	0.0036023	0.00434587	0.0019117	0.0143003	0
AD59	0	2620	59.5788	65.6822	67.4847	85.1632	0.13133	0.0735682	0.30913	0.0720606	0.768912	0
	30	6200	68.4783	69.2262	81.4928	86.2018	0.102759	0.0295288	0.350057	0.0715296	0.865957	0
	60	0	61.1413	54.6367	61.7587	72.7003	0.0679048	0.0483013	0.247476	0.051085	0.794209	0
	90	528	51.6304	57.5901	66.7689	83.2344	0.0853317	0.0624061	0.263904	0.0589973	0.74761	0.00897498
	105		49.1793	47.6933	58.9474	62.5185	0	0.0576369	0.270112	0.0627145	0.716001	0.00465948
	120	80	54.8234	64.9144	72.6994	80.7122	0.0630427	0.0491639	0.260704	0.0519346	0.788094	0.00606671
	150	16	60.1902	63.733	64.9284	81.1573	0.0944002	0.0388136	0.264334	0.0446064	0.814229	0.0145726
	180	0	59.1712	66.4501	70.9611	84.273	0.0597649	0.0226793	0.18544	0.0272949	0.664421	0.00362752
	210	0	56.0462	55.2865	56.4417	74.3323	0.0575251	0.0167938	0.170444	0.0215598	0.600021	9.38151e-05
AD60	0	32	56.3859	59.3621	55.6237	62.908	0.0931983	0.0193814	0.040832	0.241671	0.0485224	0.055132
	30	0	88.1114	81.9256	73.9264	84.273	0.118929	0.0265353	0.0200101	0.370552	0.0608502	0.0934086
	60	0	88.7228	82.4572	67.8937	82.9377	0.092652	0.0224764	0.0290361	0.264399	0.0420133	0.0550695
	90	0	75.0679	71.1754	62.4744	72.5519	0.0710733	0.0203961	0.0197713	0.159362	0.0388081	0.0325851
	150	0	70.1087	59.5983	57.6687	68.546	0.0681233	0.0145614	0.0056353	0.132651	0.0441337	0.0260806
	180	0	63.7908	66.4501	57.0552	61.276	0.0492214	0.0197366	0.00630389	0.0814599	0.0246064	0.0149791
	210	176	67.1875	76.9049	50.7157	57.1217	0.0353454	0.0235418	0.0173835	0.0832654	0.0239653	0.0153544
AD61	0	1120	78.9773	70.5736	60.1316	68.7407	0.0275089	0.00734722	0.0388133	0.960143	0.0272584	0.0106295
	30	192	77.1465	72.818	77.8947	78.2222	0.0230471	0.00820637	0.020011	0.92192	0.0161673	0
	60	16	82.7652	82.3566	71.9737	85.2593	0.1358	0.0159091	0.0365637	0.931605	0.0254241	0.0742561
	90	48	79.8611	71.6958	66.9737	77.4074	0.068571	0.00945066	0.0240065	0.671584	0.0224807	0.0584121
	120	0	72.7273	79.1771	56.4474	77.9259	0.146971	0.108697	0.0831329	1.00877	0.0514027	0.100328
	150	16	74.4949	73.4414	63.0263	71.037	0.125098	0.0650288	0.0481808	0.790342	0.0282395	0.0352478
	180	0	73.7374	75.187	62.7632	74.4444	0.0882633	0.0238192	0.0338105	0.519208	0.0288367	0.016947
	210	16	73.1061	75.2494	80.3947	76.963	0.0499521	0.0152277	0.0272633	0.415612	0.0235898	0.00807241
AD65	0	0	85.4798	83.6035	58.1579	74.2222	0.139826	0.0380396	0.365839	0.548143	0.0667169	0.0205571
	30	0	88.3207	83.9152	71.0526	84.2222	0.136639	0.0355511	0.284149	0.431965	0.051488	0.0249192
	60	0	87.3106	72.3815	59.3421	73.6296	0.12218	0.032707	0.2681	0.464711	0.0445348	0.0155431
	90	96	77.0833	69.7631	51.0526	75.4815	0.0965495	0.0452684	0.511053	0.655231	0.0681673	0.128607
	120	0	75.947	77.8678	60.6579	71.037	0.156163	0.065177	0.684537	0.660232	0.0636455	0.0944121
	150	0	82.3232	77.3691	60.7895	74.0741	0.131808	0.0492679	0.643777	0.534687	0.0253388	0.0736043
	210	32	88.0682	83.4165	76.4474	81.7778	0.104903	0.041891	0.622792	0.514643	0.042146	0.0420668
AD73	0	16	55.5556	48.5661	60.5263	68.1481	0.0139222	0.132635	0.0430102	0.201158	0.692252	0.0121838
	30	0	53.4722	50.8728	62.7632	67.1111	0.221312	0.303932	0.157603	0.97991	0.672885	0.037454
	60	0	41.6667	40.8354	57.6316	58.3704	0.0782662	0.263582	0.0899152	0.62967	0.55259	0.0151922
	90	0	38.0682	42.5187	68.6842	61.1852	0.0460271	0.236237	0.063827	0.453716	0.506946	0.0060167
	120	16	37.5631	35.6608	59.4737	61.037	0.0380428	0.230312	0.0541573	0.36699	0.610946	0.00777157
	150	16	44.4444	46.6958	61.3158	63.4074	0.029354	0.200508	0.0343142	0.232594	0.473716	0
	210	0	46.7803	48.2544	65.9211	64.2222	0.05797	0.168779	0.0475765	0.204928	0.355041	0.00536489
AD75	0	0	69.7842	84.9633	80.3849	78.168	0.0128487	0.00450313	0.0425402	0.800463	0.197037	0.0266239
	30	1360	68.9928	85.3912	77.2812	87.6722	0.0190549	0.0161461	0.036698	0.562234	0.150582	0.00706962
	60	0	73.1655	80.9291	86.2818	76.0331	0.012748	0.0120577	0.0254838	0.564298	0.0900507	0.00546517
	90		71.7266	80.8068	77.964	81.3361	0.00902426	0.00868039	0.0258867	0.397195	0.0830122	0.00150418
	120	16	70.7194	81.2958	74.8603	73.8292	0.00603854	0.00853226	0.0274983	0.340238	0.0994355	0.00691921
	150	0	74.1727	83.6186	88.7647	89.4628	0.0131506	0.0117911	0.00832672	0.0163927	0.0176604	0.00711976
	180	0	66.0432	81.1736	87.1508	80.0275	0.00634047	0.0159091	0.0155119	0.289392	0.0534076	0
AD76	0	0	79.6403	75.5501	61.0801	73.0716	0.030763	0.0154351	0.0454276	0.53052	0.208725	0.00671865
	30	0	82.0144	77.5672	66.0459	82.0248	0.0556552	0.0154943	0.0716837	0.590494	0.228006	0.00727018
	60	0	87.554	77.5061	63.7492	79.1322	0.0339836	0.0148426	0.0229656	0.524249	0.17349	0
	120	0	92.8777	82.0905	75.2328	83.4711	0.0181156	0.0107542	0.0329376	0.446492	0.105962	0
	150	0	91.1511	77.9951	88.5785	86.7769	0.0101313	0.00871001	0.0264239	0.358813	0.11202	0.000701949
	180	10128	84.8201	77.0171	73.6189	76.5152	0.00942683	0.0091544	0.0230999	0.363854	0.128528	0.0051142
AD78	0	0	101.871	80.8068	85.1645	85.6749	0.00664239	0.0156721	0.00557353	0.330791	0.3088	0
	30	0	107.914	91.3203	50.838	88.9807	0.0117416	0.015287	0.0152097	0.486541	0.300482	0
	60	48	80.7194	87.8362	84.7921	88.1543	0.00473019	0.0105764	0.0151425	0.271611	0.27429	0
	90	0	88.6331	88.5086	83.6127	90.2893	0.00419343	0.00986542	0.0164856	0.203976	0.269726	0
	120	0	66.4029	81.5403	80.0745	73.4848	0.0119093	0.0181607	0.015109	0.146701	0.130576	0
	150	0	87.3381	79.3399	69.2117	77.9614	0.00291863	0.029063	0.00977047	0.110661	0.120935	0
	180	16	79.3525	74.2054	71.5084	79.5455	0.000503212	0.0200271	0.0174928	0.0842259	0.102507	0
AD79	0	3600	75.5396	83.0685	80.0745	71.6253	0	0.0689055	0	0.255417	0	0
	30	0	74.4604	85.6968	63.1906	54.7521	0	0.0453817	0	0.212106	0	0
	60	4640	78.8489	82.7628	70.3911	79.4766	0	0.0285218	0	0.142223	0	0
	90	0	81.8705	85.2689	74.3017	77.4105	0.000747469	0.0245234	0	0.194313	0.000810813	0
	120	0	83.3094	76.6504	67.6598	85.3994	0	0.0463813	0.0265208	0.153812	0.000810813	0
	150	0	75.6115	93.8875	74.4258	83.1267	0	0.0402504	0.0212872	0.207482	0	0
	180	48	81.3669	90.2812	73.4947	86.9146	0	0.0499798	0.0279909	0.239205	0	0
AD82	0		73.2723	81.5169	83.8806	72.91	0.0291513	0.0166599	0.0412218	0.0799494	0.0392434	0.00125
	30	13	76.4363	92.7835	84.7015	80.7074	0.00672722	0.0235905	0.0304018	0.0626836	0.0202703	0.00265
	60	0	103.747	88.5862	91.0448	77.2508	0.00457825	0.0145941	0.024933	0.0504513	0.0300812	0.00145
	90	0	95.5037	86.8189	81.4179	80.7074	0.0132676	0.0145941	0.0299314	0.0461787	0.0310542	0.004
	120	0	96.4197	89.7644	88.6567	83.119	0.0191539	0.0179927	0.0154655	0.0393309	0.033892	0.009
	150	0	90.4246	86.7452	84.403	80.7074	0.0216766	0.0193255	0.03246	0.0445984	0.0409461	0.0012
	180	0	90.7577	90.1325	86.8657	86.4952	0	0.0151272	0.0233453	0.0409697	0.0234325	0.0033
AD85	0	11160	84.0966	79.0869	77.1642	69.6141	0.215458	0.0281886	0.487429	0.0958106	0.361298	0
	30	0	91.174	84.6097	70.597	70.7395	0.234612	0.0274556	0.331657	0.0596987	0.345163	0
	60	32	80.5162	89.3962	80.5224	68.1672	0.181168	0.0219245	0.223515	0.0327758	0.238703	0
	90	0	82.7644	85.4197	89.1045	78.6977	0.153044	0.0209915	0.200758	0.0230016	0.198406	0
	120	48	87.1774	87.1134	83.3582	77.492	0.168741	0.0189923	0.164887	0.0198996	0.180974	0
	150	32	93.3389	94.9926	84.9254	76.2058	0.175842	0.0284552	0.1436	0.0157441	0.176028	0
	180	16	79.0175	82.9161	72.2388	65.5145	0.13389	0.0352524	0.186821	0.33841	0.291731	0
AD86	0	0	108.576	99.6318	83.1343	89.791	0.0146691	0.0212581	0.00882065	0.345609	0.0529461	0.0044
	30	0	108.16	97.4227	93.6567	90.3537	0.0305528	0.0481139	0.00793859	0.132274	0.0371353	0
	60		102.914	92.8571	87.9104	86.3344	0.0610122	0.0404504	0.0124665	0.0529094	0.0377839	0.00015
	90	0	93.6719	85.8616	89.0299	86.1736	0.0214897	0.0341196	0.00829141	0.0388627	0.0161352	0.00365
	120	16	88.9259	83.7261	86.4179	70.9003	0.00579288	0.0224576	0.00341065	0.0296738	0.0207568	0
	150	0	78.6012	85.567	87.0896	82.4759	0	0.0177262	0	0.0230016	0.0104595	0
	180	0	23.1474	17.5258	8.40299	13.3119	0.00383078	0.0225242	0	0.0309029	0.0234325	0
AD87	0	2760	82.348	86.2297	74.4776	77.2508	0.303192	0.0201252	0.0355766	0.410926	0.368596	0.1309
	30	96	101.665	93.8881	82.9851	81.9936	0.482118	0.0242569	0.0719177	0.394714	0.599596	0.2146
	60		88.9259	89.028	71.4179	64.2283	0.500617	0.01646	0.0475139	0.342214	0.746435	0.1621
	90	48	87.4271	85.6406	83.7313	73.1511	0.366634	0.0183259	0.0514538	0.293402	0.792732	0.19145
	120	32	95.0874	93.7408	80.3731	66.4791	0.158931	0.019059	0.0927345	0.287315	0.643948	0.1625
	150	0	91.2573	83.5052	75.5224	71.7042	0.158277	0.017393	0.128605	0.257758	0.528975	0.1428
	180	0	91.8401	87.3343	81.194	66.9614	0.213029	0.0191923	0.104907	0.227265	0.497272	0.14465
BT01	0	0	100.08	92.1811	93.9363	74.0782	0.0173651	0.147164	0.131486	0.382262	0.03068	0.066069
	30	0	81.4607	80.776	90.6475	61.2548	0.0391158	0.323308	0.215519	0.366013	0.0614905	0.138859
	60	16	76.0835	71.5461	96.0946	66.0429	0.00921415	0.169229	0.119724	0.29035	0.0328123	0.082933
	90	64	85.7143	74.7208	102.775	72.8123	0.0234784	0.216041	0.0936862	0.738062	0.0393835	0.0632634
	120	0	88.9246	76.6608	90.9558	74.6285	0.0515638	0.340057	0.0959793	0.74182	0.063971	0.0969916
	150	32	90.2889	93.592	87.1531	88.1673	0.0318065	0.302513	0.126641	0.574133	0.048	0.0697377
BT02	0	400	85.313	81.893	101.644	75.1789	0.0219914	0.0370226	0.34575	0.340716	0.0382322	0.00750047
	30	0	104.173	77.8366	117.575	91.6346	0.0258248	0.0276428	0.3032	0.28143	0.0352308	0
	60	16	94.061	88.0071	107.914	88.2223	0.0957668	0.100198	0.40555	0.444067	0.0373548	0.009611
	90	0	86.5169	90.241	94.8613	87.672	0.025892	0.0489405	0.3517	0.361397	0.026781	0
	120	176	92.6164	91.0641	99.4861	92.1299	0.0404857	0.044361	0.3495	0.316174	0.0358773	0.00639651
	150	64	82.1027	72.8395	95.6835	73.3627	0.0379301	0.0500992	0.32935	0.284408	0.0307981	0.0014936
	180	0	77.7689	79.1887	106.886	84.5349	0.0342313	0.0443058	0.30565	0.270455	0.0271965	0
BT07	0	0	112.032	83.6823	69.7248	70.3093	0.998423	0.0391193	0.7607	0.175156	0.150297	0.00944865
	30	0	34.2792	83.1897	33.0275	27.3196	0.940519	0.00943498	0.72635	0.198815	0.113127	0.00805246
	60	32	12.8263	11.9458	8.47969	7.48454	1.19043	0.0347053	0.7571	0.169917	0.133582	0.0115592
	90	0	129.285	72.968	78.3093	71.3402	1.12607	0.0448024	0.66175	0.429232	0.120237	0.0230859
	120	176	114.415	82.7586	68.021	41.2371	1.02196	0.0367468	0.6168	0.390958	0.116682	0.0154231
	150	16	112.826	82.5123	69.2661	77.4227	0.835202	0.0209114	0.5962	0.296265	0.0974274	0.0183778
BT08	0	0	107.378	84.8522	84.7313	80.8247	0	0.228922	0.20745	0.447597	0.0298746	0.0040587
	30	48	114.756	95.936	77.7851	72.5773	0	0.499447	0.55325	0.973727	0.0696305	0.0025651
	60	0	116.572	86.5764	81.7824	68.0412	0	0.364654	0.5203	0.936942	0.0562862	0
	90	0	99.546	84.8522	86.5007	81.6495	0	0.302085	0.48115	0.653857	0.030752	0.00347425
	120	40	101.93	91.9951	72.0839	85.6701	0	0.257614	0.5449	0.571574	0.0277506	0.00178583
	150	0	118.388	89.7167	69.2005	73.5052	0	0.297064	0.60975	0.666652	0.0321372	0
	180	64	102.497	80.7882	91.481	67.5258	0.00114328	0.258772	0.712	0.62926	0.0312137	0
BT09	0	0	4.35868	3.58374	3.85321	0.618557	0.250984	0.999832	0.4687	0.891002	0.498588	0.220046
	30	0	90.1249	51.601	50.5898	42.1649	0.258718	1.08475	0.50795	0.911518	0.523614	0.252906
	60	0	12.0318	8.05419	6.173	3.85567	0.409497	1.11642	0.5998	0.997607	0.5268	0.333982
	90	0	107.151	58.436	50.6553	58.4536	0.306736	0.927552	0.50955	0.970914	0.520382	0.202383
	120	0	89.6708	43.9039	48.2962	40.5155	0.334108	1.03923	0.5108	1.09754	0.434683	0.181343
	150	208	81.3848	41.8103	42.9227	35.0515	0.289183	0.990949	0.47385	0.962973	0.515534	0.188226
	180	16	94.2111	41.9335	46.7235	44.5361	0.362219	0.994645	0.4309	0.913062	0.441009	0.11991
BT12	0	0	105.675	81.1576	61.599	78.5567	0.0172742	0.165376	0.180018	0.154255	0.0305265	0
	30	0	100.908	68.2882	58.4535	85.4639	0.0193948	0.257541	0.123699	0.13312	0.00415661	0
	60	0	83.5414	66.6256	61.599	75.8763	0.0240779	0.243001	0.166956	0.115494	0.0167158	0.00497814
	90	32	67.6504	67.7956	63.827	67.1134	0.013033	0.207538	0.146939	0.134224	0.0199785	0
	120	77	83.5414	66.3177	61.1402	85.1546	0.0253149	0.302382	0.181205	0.125667	0.0130508	0
	150	64	114.642	70.197	50.3277	61.0309	0.0863269	0.74244	0.728757	0.282565	0.0590864	0
BT13	0	520	105.822	83.3083	95.7129	75.0482	0.0116634	0.0151703	0.0861752	0.0108042	0.0770983	0.0168345
	30		46.7249	18.0752	2.37288	0.61657	0.00980786	0.0150521	0.053164	0.0113562	0.077143	0.0312369
	60	32	84.2795	97.4436	92.0239	73.9884	0.0274797	0.0126091	0.0573371	0.0148656	0.05417	0.0514154
	90	304	102.62	92.3308	84.5464	67.8227	0.0058317	0.00165495	0.0572353	0.0156936	0.0665057	0.0462853
	120		96.0699	109.173	94.2173	68.2081	0.397307	0.123096	0.722447	0.0853293	0.365647	0.0164545
	150	0	82.9694	97.1429	93.9182	63.5838	0.449792	0.2774	0.515185	0.14491	0.35139	0.037241
BT14	0	1600	78.3115	110.677	90.329	1.50289	0.640294	0.568277	0.592268	1.01208	0.0885402	0.0435492
	30	0	106.841	102.105	102.692	73.2177	0.756045	0.766555	0.711692	1.01125	0.0949762	0.035835
	60	0	58.2242	109.774	101.795	71.9653	0.605393	0.639321	0.594575	0.917724	0.0819701	0.0411171
	90	128	58.2242	99.0977	96.012	74.2775	0.618072	0.634751	0.53561	0.969576	0.0838472	0.0452213
	120	32	123.581	90.8271	103.988	67.6301	0.4911	0.599839	0.486619	1.01252	0.0710645	0.037659
	150		98.3988	75.4887	94.5165	70.1349	0.62492	0.728058	0.604041	1.00928	0.089881	0.0634998
	180		119.36	99.0977	86.4407	60.8863	0.466227	0.570365	0.432098	0.866778	0.0710645	0.0310849
BT15	0	4000	65.4703	66.2147	61.3967	68.6275	0.22483	0.357665	0.266804	0.783302	0.194645	0.287364
	30	128	67.5743	49.7175	58.0989	81.5273	0.255137	0.209705	0.302835	0.992052	0.184366	0.258559
	60	160	71.2871	65.8757	55.7711	39.9381	0.181401	0.170223	0.451402	0.840281	0.137123	0.282766
	90	704	69.0594	61.0169	59.7478	50.1548	0.149769	0.136454	0.480105	0.769068	0.116027	0.210754
	120	400	67.0792	58.1921	50.5335	60.7843	0.20411	0.166401	0.503447	0.945602	0.142844	0.30131
	150	0	58.5396	50.2825	56.644	64.4995	0.196069	0.142365	0.340833	0.928173	0.119961	0.270454
BT16	0		121.252	87.0677	97.5075	64.9326	0.414448	0.383514	0.556068	0.415921	0.357692	0.0864144
	30	0	127.511	115.188	91.6251	70.1349	0.440912	0.356996	0.519799	0.36537	0.31255	0.0601557
	60	160	109.461	103.308	97.4078	72.9287	0.448423	0.295763	0.430028	0.330119	0.336953	0.0183925
	90	0	109.898	72.3308	94.4167	76.5896	0.424698	0.270899	0.474337	0.422467	0.284929	0.0335169
	120	400	108.006	107.97	86.2413	71.3873	0.467994	0.331344	0.518985	0.373414	0.318226	0.0495534
	150	16	100.728	66.1654	74.8754	56.262	0.401416	0.281498	0.449502	0.305435	0.26571	0.0319209
BT17	0	320	92.5764	76.391	77.1685	74.3738	0.260262	0.197924	0.102901	0.0477118	0.0986859	0
	30	0	113.1	98.797	73.2802	78.7091	0.200045	0.150561	0.0790844	0.043335	0.064271	0
	60	44	107.132	68.2707	77.5673	79.0944	0.448864	0.668401	0.0687366	0.0457797	0.0384821	0
	90	384	103.493	89.0226	78.0658	81.7919	0.436229	0.536518	0.0745382	0.0334377	0.044203	0
	120	0	49.345	42.5564	30.2094	6.1657	0.379944	0.480131	0.0695509	0.0321759	0.0522928	0
	150	0	116.885	68.7218	71.3858	80.5395	0.402873	0.431862	0.0846146	0.0325702	0.0344149	0
BT18	0	240	116.681	96.7066	68.3839	61.6856	0.336869	0.986742	0.398917	0.850927	0.212836	0.106479
	30		89.3523	101.018	70.3362	68.6143	0.377912	0.930159	0.389655	0.806606	0.195584	0.0941286
	60	0	107.897	92.994	75.1085	67.2182	0.295473	0.829601	0.349111	0.849902	0.201841	0.0885425
	90	59	102.307	92.0958	67.7332	59.7208	0.333953	0.777273	0.30236	0.92975	0.131224	0.0390271
	120	0	104.969	104.611	67.1367	67.6836	0.301791	0.899739	0.373607	0.872851	0.10977	0.0646018
	150	16	111.713	94.6707	70.4447	65.667	0.243297	0.748548	0.302767	0.70235	0.128721	0.036937
BT20	0	0	106.168	84.7996	68.4524	59.3116	0	0.0506796	0.183765	0.935562	0	0
	30	80	101.589	81.1036	71.0119	59.9262	0	0.0228721	0.0771569	0.8688	0.0131077	0
	60	32	99.0654	78.1364	70.4762	69.0842	0	0.0692056	0.132915	0.965905	0	0
	90	96	92.6168	88.2353	68.5714	69.0227	0.00534454	0.0814704	0.0967356	1.00767	0.00248404	0
	120		85.6075	79.3857	76.8452	68.531	0	0.109978	0.040426	0.713946	0.00614356	0
	150	48	93.7383	85.1119	72.381	69.5759	0	0.190454	0.0622384	0.875866	0.0104906	0
BT24	0	1280	92.8037	93.0245	90.0595	81.9914	0.236871	0.0392988	0.403488	0.291944	0.05975	0
	30	10	90.4673	85.6845	83.1548	98.8322	0.185527	0.0192627	0.370618	0.17965	0.0578426	0
	60	0	90.6542	89.6929	75.5952	88.0148	0.186789	0.0333321	0.328041	0.260841	0.0481283	0.00654077
	90	144	87.4766	89.2764	90.0595	85.0645	0.189941	0.0341056	0.334163	0.260115	0.0534734	0
	120	128	89.2523	93.545	86.8452	83.405	0.175289	0.0173843	0.342821	0.260313	0.0513886	0
	150	192	89.7196	92.2957	93.1548	85.1875	0.148176	0.0192258	0.332205	0.272365	0.0556025	0
	180	0	82.1495	83.7585	73.631	76.2139	0.167782	0.0266289	0.25764	0.229838	0.0476181	0.00459072
BT25	0	800	78.0374	64.81	61.0119	60.4179	0.0160036	0.00103127	0.00261969	0.596534	0.00723033	0.000325007
	30		101.028	69.9636	70.119	63.8599	0.0115898	0.00729256	0.00151666	0.495698	0.00782916	0
	60	0	107.57	79.646	79.8214	71.2354	0.00963818	0	0.0225845	0.375612	0.00955911	0
	90	128	96.4486	83.6543	77.0238	67.4247	0.00717609	0.0198151	0.0214263	0.221616	0.0128194	0.00284381
	120	0	88.972	72.5143	66.25	70.9896	0.00867736	0.00261501	0.0299748	0.159741	0.0153256	0
	150	0	88.3178	77.6158	72.2024	80.1475	0.00351298	0	0.037503	0.1116	0.0145272	0
BT26	0	0	96.729	87.5065	83.631	89.1211	0.00921782	0.00618762	0.278818	0.431247	0.120986	0
	30	0	91.6822	85.6845	75.4762	68.4081	0.0269329	0.0208832	0.610085	0.362735	0.225648	0.00893769
	60						0.00825701	0.00836066	0.39687	0.294024	0.0967888	0
	90	0	108.972	83.0297	82.0238	78.6724	0.0242906	0.0164635	0.774712	0.939293	0.168915	0.0107252
	120	11906	37.3832	66.9964	63.631	63.7984	0	0	0.737623	0.761657	0.134182	0
	150	0	97.757	76.1583	63.8095	74.0627	0.0174148	0.00894996	0.717631	0.461986	0.101069	0.00662202
	180		102.523	73.139	74.4643	81.1924	0.00741629	0.00626129	0.618441	0.278539	0.0762733	0.0092627
BT28	0	0	48.3816	48.1633	51.9622	34.1718	0.0937696	1.02762	0.743414	0.454987	0.532338	0.0010969
	30	80	54.8552	56.8513	54.9419	34.7853	0.103828	1.08747	0.808768	0.499429	0.523289	0.0141378
	60	56	48.552	45.656	45.5669	29.7546	0.107011	1.12416	0.760952	0.619085	0.560151	0.0138941
	90	720	49.2334	50.7872	51.6715	34.7239	0.121813	1.05182	0.826086	0.540866	0.638997	0.0124315
	120	188	48.0409	48.7464	55.4506	33.865	0.0771655	0.973777	0.737954	0.434515	0.593641	0
	150	224	51.0221	49.9125	52.6163	33.5583	0.0799278	0.936946	0.757395	0.521385	0.590048	0.00337195
BT29	0	440	93.6968	105.248	80.8866	44.6626	0.180964	0.809363	0.788831	1.12502	0.615909	0.0377008
	30	0	95.4855	94.9271	74.6366	44.1104	0.208497	0.756179	0.885594	1.05152	0.644408	0.0318913
	60	16	101.363	102.157	90.2616	53.9877	0.138027	0.535193	0.795587	0.977032	0.555582	0.0194598
	90	30	95.5707	100.641	76.2355	36.6871	0.286113	0.98549	0.891303	0.956825	0.574434	0.0286006
	120	520	91.5673	66.9971	62.064	29.2025	0.367632	1.07142	0.848753	1.03597	0.695464	0.0383915
	150	0	81.0903	84.6647	63.4448	37.8528	0.249752	0.959671	0.868773	0.846579	0.679606	0.0230755
BT30	0	0	95.7411	93.2945	78.9971	51.5337	0.271641	0.640235	0.110496	0.594784	0.0408314	0.16685
	30	96	98.2112	98.5423	90.407	59.2638	0.235039	0.578801	0.107904	0.57494	0.028389	0.115296
	60	0	102.385	102.507	100.145	64.6012	0.16484	0.621377	0.0704835	0.59627	0.0309396	0.0782861
	90	94	96.2521	100.175	89.6802	57.7301	0.286863	0.647159	0.141767	0.591846	0.0339781	0.173269
	120		93.0153	100.875	89.7529	60.4908	0.228584	0.394093	0.097425	0.504678	0.0114887	0.0680484
	150	0	91.2266	94.9271	89.6802	67.1166	0.166671	0.390594	0.0836647	0.515244	0.0147268	0.0313632
BT32	0	0	66.0988	84.1983	73.7645	69.8773	0.580314	0.386587	0.462402	0.382262	0.278034	0.00366878
	30	144	68.3135	81.0496	72.093	70.8589	0.537123	0.341892	0.491251	0.366013	0.257973	0
	60	80	69.2504	80.0583	64.3895	64.2945	0.509082	0.180379	0.464399	0.29035	0.302622	0
	90	4000	64.6508	79.4169	65.7703	64.4785	0.385488	0.25636	0.434699	0.738062	0.215369	0.000709093
	120	64	66.5247	57.7843	65.625	56.6258	0.544565	0.278378	0.389724	0.74182	0.316591	0.000924904
	150	0	61.2436	71.4869	65.5523	61.1043	0.442944	0.287505	0.33602	0.574133	0.289871	0.0082933
BT34	0	0	78.4062	102.463	96.0234	84.7682	0.425534	0.766493	0.82557	0.382262	0.297617	0.382879
	30	0	80.2057	105.161	93.4503	84.106	0.398911	0.815469	0.767724	0.366013	0.321639	0.351433
	60	176	78.5775	102.346	90.4094	85.052	0.399708	0.862751	0.769647	0.29035	0.362981	0.341474
	90		79.8629	101.408	94.7368	84.9574	0.335918	0.815093	0.790729	0.738062	0.39588	0.280554
	120	0	74.3787	99.1202	96.4912	96.6887	0.316161	0.812881	0.868215	0.74182	0.359412	0.30901
	150		65.8955	100.938	94.6199	90.1608	0.255117	0.755296	0.751671	0.574133	0.31002	0.256291
	180		84.4901	99.5308	81.0526	90.8231	0.221893	0.577881	0.705624	0.382262	0.274901	0.220065
BT36	0	240	79.7772	93.2551	91.2281	93.1883	0.573005	0.416509	0.452675	0.366013	0.28478	0
	30	16	95.03	107.742	92.6316	94.5128	0.103393	0.187906	0.0522616	0.29035	0.125723	0.0120237
	60		10.5056	98.827	103.626	95.8373	0.35377	0.370873	0.0755999	0.738062	0.252533	0.0179123
	90	64	93.3162	115.718	103.977	104.068	0.104235	0.148857	0.0319191	0.74182	0.191434	0.00894074
	120	176	95.8012	115.601	104.094	108.609	0.0918757	0.157373	0.0277397	0.574133	0.196091	0.00761504
	150	0	89.0317	114.604	94.7368	106.339	0.075618	0.134132	0.021563	0.382262	0.165628	0.00403875
	180	0	101.028	109.091	90.2924	94.5128	0.064189	0.122417	0.0208972	0.366013	0.13299	0.00505614
BT38	0	0	69.4087	101.114	105.497	92.9991	0.0109418	0.0286988	0.164182	0.29035	0.054049	0
	30	0	81.4053	100.352	94.8538	98.3917	0.0178081	0.0422013	0.205126	0.738062	0.0716301	0
	60		74.9786	102.698	101.404	92.9044	0.0186055	0.0557039	0.231201	0.74182	0.0756772	0
	90	48	4.14739	72.3754	150.76	127.152	0.0170107	0.031898	0.149683	0.574133	0.0594016	0
	120	96	86.0326	95.8944	89.0058	92.9991	0.018384	0.0415427	0.169915	0.382262	0.0637534	0
	150	0	72.0651	91.5543	91.2281	89.877	0.0162134	0.0340151	0.167696	0.366013	0.0684098	0
	180	320	105.827	101.408	88.1871	100.473	0.0244529	0.043895	0.1026	0.29035	0.0336392	0.0128562
	210	0	85.1757	96.3636	80.8187	88.3633	0.0110304	0.0345797	0.165661	0.738062	0.0529175	0
BT40	0	120	93.4876	100.117	74.7368	85.7143	0.0155932	0.062761	0.0240041	0.74182	0.26598	0
	30	0	84.7472	103.402	90.1754	97.6348	0.00447418	0.0657249	0.0220808	0.574133	0.272464	0
	60	4186	81.491	99.2962	76.2573	80.1325	0.00536015	0.031945	0.0315123	0.382262	0.17233	0
	90	144	94.5159	99.1789	81.2865	84.2952	0.0139541	0.0526929	0.0319561	0.366013	0.243046	0
	120	96	86.3753	96.8328	71.462	71.0501	0.00788519	0.0453064	0.0228945	0.29035	0.271811	0
	150	160	90.2314	95.5425	63.0409	71.334	0.00797378	0.0475177	0.0171616	0.738062	0.362459	0.00151068
BT41	0	360	103.042	85.0472	76.0711	77.1323	0.0160782	0.00931131	0.105284	0.986775	0.152049	0.00652999
	30	768	107.757	74.6226	69.5402	69.2831	0.0108822	0.0104068	0.097637	0.990814	0.141036	0.01306
	60	16	101.977	78.1604	67.9728	73.6712	0.0171566	0.00803328	0.110473	0.923206	0.113761	0.011886
	90	64	114.144	84.1509	67.8161	68.8504	0.0153919	0.0105285	0.173562	0.798865	0.102813	0.014454
	120		100.304	71.0377	78.9969	80.9642	0.0186271	0.0074247	0.140174	0.955519	0.101323	0.0097583
	150	48	90.4943	81.934	73.6677	68.2324	0.00970572	0.0129019	0.140857	1.02679	0.0862928	0.0126931
BT42	0	480	82.2329	75.1378	48.7055	58.4941	1.25968	0.221037	0.332444	0.860197	0.599839	0.356728
	30	2144	118.968	90.692	61.3269	75.2334	1.12861	0.194868	0.319403	0.859638	0.569584	0.293556
	60	0	78.2713	79.7306	40.8576	52.8936	1.6338	0.32906	0.285196	0.78215	0.530195	0.376685
	90	16	102.161	90.2021	47.1683	61.0454	1.49811	0.356629	0.504572	0.729518	0.42965	0.440884
	120	0	88.5954	64.85	43.2848	48.1643	1.24959	0.373061	0.277617	0.559131	0.419608	0.273452
	150		81.1525	59.8285	50.1618	62.3522	1.57723	0.40276	0.168236	0.470893	0.49126	0.243811
	180	128	85.4742	68.218	55.8252	52.1469	1.47164	0.40848	0.129045	0.541546	0.445587	0.166331
BT44	0	48	62.4335	78.7264	71.8391	71.2608	0.0725114	0.153979	0.290159	0.37499	0.111017	0.107389
	30	0	69.8099	87.2642	81.1912	73.5476	0.0466241	0.142161	0.268372	0.384932	0.106464	0.122587
	60	0	64.4106	81.0849	76.698	67.4289	0.0410672	0.123697	0.263828	0.50522	0.0882063	0.144361
	90		49.3536	75.6604	60.1358	46.6007	0.0357813	0.101303	0.243032	0.304469	0.0910991	0.113181
	120	0	32.0913	73.4906	43.6782	45.7355	0.0404573	0.0981126	0.229342	0.313945	0.108076	0.0976344
BT45	0	0	0.714829	6.27358	0.470219	22.1879	0.0295093	0.01844	1.25085	0.365504	1.10069	0.049085
	30	0	6.34221	9.36792	11.3375	1.74289	0.0217643	0.00900702	1.03502	0.292118	0.934256	0.0349978
	60	0	23.7262	33.4906	53.9707	62.4845	0.0142154	0.0108936	1.06711	0.352517	1.02307	0.0347043
	90	32	32.2433	41.4151	55.0679	53.152	0.0172546	0.0120499	0.914852	0.332198	1.14701	0.0428485
	120	208	18.0989	28.5377	53.605	61.6811	0.010392	0.0129019	1.14092	0.297151	0.989905	0.041968
	150	16	23.4221	25.3774	39.2372	50.8035	0.0265682	0.0132671	1.01365	0.77432	0.890397	0.055615
	180	160	30.038	24.2925	47.8579	51.6069	0.0245094	0.0114413	1.15806	0.6227	1.00014	0.0327233
	210	0	23.8023	35.8491	47.2309	46.9098	0.0160782	0.0115022	0.951039	0.421181	1.05793	0.0360984
BT46	0	0	61.6071	81.7561	77.5455	73.015	0.166174	0.00845929	0.5891	0.21463	0.0317443	0.0175356
	30	79	54.0923	69.7561	67.3636	80.1502	0.430287	0.0232478	0.73931	0.500347	0.0452195	0.0296418
	60	240	56.1012	76.8293	66.0909	71.7811	0.297152	0.0401056	0.775566	0.520667	0.0724937	0.0454164
	90	0	57.7381	68.0488	58.3182	64.6459	0.255486	0.0679178	0.647067	0.294355	0.0572046	0.0388865
	120	0	64.6577	79.3659	72.6364	77.5751	0.0952925	0.029638	0.467429	0.183125	0.0389354	0.0162883
	150	16	73.6607	75.1707	58.8182	71.191	0.112645	0.0310377	0.762798	0.234949	0.0916699	0.0328701
	180	32	53.3482	69.3659	62.4091	66.4163	0.0876456	0.022761	0.902221	0.279255	0.0610917	0.0283211
BT47	0	0	58.5565	66.2927	57.2273	60.8369	0.065195	0.024039	0.20852	0.80626	0.183923	0.16956
	30	192	68.0804	67.8049	65.4091	65.8262	0.0139213	0.0240999	0.552776	0.714542	0.478044	0.140285
	60	2480	71.2798	76.7805	60.9091	60.0858	0.0140194	0.0191703	0.421341	0.747911	0.377434	0.150483
	90	208	68.8244	72.6341	59.0909	56.5451	0.0220584	0.0206918	0.427008	0.594178	0.366874	0.167285
	120	16	66.369	76	54.0909	57.3498	0.0571559	0.0145451	0.332171	0.473503	0.36059	0.157527
	150	600	71.8006	77.1707	49.6364	58.1545	0.0122547	0.0230044	0.437591	0.546952	0.280581	0.131554
	180	0	73.0655	65.122	50.8636	56.7597	0.00990179	0.018014	0.455822	0.334621	0.197463	0.0895856
BT48	0	2304	57.7381	73.8537	59	65.1288	0.052619	0.011884	0.0164111	0.280425	0.0973677	0.0553415
	30	435	60.119	67.7073	68.1818	64.2704	0.0688521	0.0142831	0.0228201	0.290498	0.1124	0.0660926
	60	560	49.0327	70.9268	60.4545	63.8412	0.0607607	0.0145621	0.0353955	0.320479	0.123296	0.0579852
	90	96	57.6637	75.0244	68.4545	63.573	0.0248772	0.0198625	0.0176735	0.321703	0.064636	0.0232646
	120	2480	65.4762	61.1707	58.0455	60.3541	0.0985539	0.0538408	0.0635565	0.208742	0.15874	0.0396556
	150	0	69.3452	66.1951	59.4091	62.5536	0.10363	0.0455275	0.0925429	0.3025	0.267508	0.0548128
	180	0	65.6994	70.0488	40.6364	68.3476	0.105288	0.0363216	0.0746267	0.299064	0.282817	0.0722612
BT49	0	0	65.3061	89.7734	76.1327	69.6329	0.0200525	0.0252745	0.74214	0.164076	0.142236	0.0166553
	30	32	70.4682	84.6295	77.9935	69.6951	0.017992	0.0190814	0.696597	0.213637	0.0998502	0.00255558
	60	7600	64.1056	81.7514	82.767	63.2234	0.0183438	0.0234333	0.727477	0.217638	0.134513	0.0122492
	90	480	75.9904	79.5468	82.1197	69.5706	0.0234197	0.0230985	0.956164	0.38322	0.181036	0.0113679
	120		65.3061	90.2021	81.9579	68.8861	0.0244249	0.0185235	0.704317	0.511524	0.136214	0.0165672
	150	896	63.1453	90.6307	83.8997	69.3217	0.0186453	0.0179655	0.590847	0.513831	0.110424	0.00343682
	180		70.5882	87.3852	73.8673	69.944	0.021912	0.034313	0.989083	0.763003	0.21055	0.0189465
	210	4464	63.6255	75.0153	78.5599	53.3292	0.0253295	0.0237123	0.88377	0.575959	0.176944	0.0186822
BT52	0	0	66.5066	61.4819	48.7055	53.8892	0.0176402	0.0280642	0.773068	0.518961	0.292839	0.0437974
	30	32	61.2245	40.1102	27.1036	35.781	0.0136196	0.0524459	0.856532	0.383832	0.233719	0.0467936
	60	0	74.3097	73.2394	60.356	60.112	0.00427184	0.0298495	0.643285	0.163605	0.172899	0.0328701
	90		88.8355	56.6442	38.3495	41.3815	0.0203541	0.044579	0.872263	0.539529	0.537637	0.079223
	120	208	71.5486	62.8291	47.4919	30.4916	0.00964934	0.0922825	0.918341	0.878647	0.634545	0.119936
	150		69.5078	69.6265	47.4919	49.2844	0.00889548	0.0713599	0.878332	0.849183	0.443487	0.0629202
	180	0	67.3469	64.0539	58.2524	56.6273	0.0075888	0.0388881	0.83478	0.831768	0.306492	0.0429161
BT54	0	880	101.561	79.4856	48.3819	51.3379	0.0183438	0.0260556	0.119102	0.786302	0.105045	0.120817
	30	320	75.03	54.9296	27.1845	36.5899	0.028546	0.0319139	0.0571474	0.694003	0.12302	0.0646826
	60	0	62.0648	48.6222	34.2233	28.6248	0.012715	0.0333087	0.030443	0.61639	0.0959886	0.0322532
	90	640	84.7539	69.7489	47.0065	46.9197	0.0141725	0.0812912	0.0409306	0.612436	0.101597	0.0275826
	120	416	39.4958	34.3539	16.3107	20.7841	0.0162833	0.0750423	0.0383572	0.719749	0.156027	0.0361306
	150	192	64.8259	63.3803	26.4563	34.4119	0.0114586	0.0328066	0.0198098	0.611212	0.138144	0.0255558
	180	0	88.7155	74.2805	41.343	45.6752	0.00914677	0.0209784	0.0125754	0.511007	0.107665	0.0105748
BT58	0	80	62.0469	96.0429	102.239	65.2819	0.02151	0.0314676	0.29234	1.05825	0.286587	0.0341038
	30	144	83.9019	92.8907	122.708	66.1721	0.0206054	0.0125535	0.407169	1.12575	0.276105	0.0259964
	60	43	76.226	72.3675	88.5928	64.451	0.0466385	0.012442	0.403722	1.0544	0.334903	0.0316363
	90	32	73.2409	88.6653	94.2431	64.8665	0.0284454	0.0164033	0.336379	1.00949	0.2716	0.0311076
	120	80	57.4627	88.1288	86.0341	68.1306	0.0303552	0.0155664	0.229804	0.927926	0.204022	0.0208853
	150	160	51.8124	73.8431	65.3518	60.9496	0.0301039	0.0124978	0.266025	1.00446	0.176944	0.0184178
	180	32	56.5032	83.8364	74.5203	66.0534	0.0257818	0.0116609	0.223686	0.922278	0.143615	0.00660926
BT63	0	0	66.7411	73.122	41.2727	69.9034	0.0370056	0.00313579	0.12462	0.578055	0.0665581	0.0123843
	30	64	100.521	68.2927	61.2727	70.9764	0.209958	0.0252954	0.50236	1.08713	0.135276	0.179763
	60	112	82.0685	43.7561	53.6364	56.0622	0.663082	0.0404865	0.427281	1.28872	0.142283	0.21032
	90	48	105.208	76.5854	68.4091	73.015	0.274669	0.0137278	0.258292	0.975306	0.10153	0.0951162
	120	0	105.804	79.2683	46.5455	73.4442	0.21064	0.00822273	0.210448	0.836248	0.0842485	0.0749439
	150		87.5	59.3659	67.6364	67.8112	0.27725	0.0186754	0.35406	1.15139	0.143859	0.168443
	180	0	95.1637	59.0244	59.7273	69.7961	0.20207	0.0186057	0.285851	1.16273	0.116652	0.277731
BT64	0	0	60.5357	66.6145	46.6948	80.2189	0.00798542	0.0884292	0.0779886	0.156332	0.317143	0.0151079
	30	0	56.6071	78.4206	46.5541	89.3667	0.00326234	0.0181876	0.0564912	0.130939	0.260861	0.0203851
	60	0	50.0893	82.3299	53.5865	86.1611	0.00457701	0.0344937	0.0556831	0.10831	0.237741	0.0216193
	90		56.0714	86.3174	53.5865	91.2432	0.00506393	0.0228564	0.0611786	0.107791	0.242937	0.0225555
	120	0	43.8393	82.3299	48.6639	85.6138	0.00223981	0.0243895	0.0869593	0.0910354	0.217773	0.0165975
	150	900	61.4286	69.5856	49.2264	81.2353	0.00895925	0.0208356	0.0879291	0.136236	0.226414	0.0158314
	180	0	65.9821	77.717	49.6484	82.3299	0.00360318	0.0354693	0.0714424	0.139806	0.249301	0.0170656
BT67	0	144	62.7679	60.8288	45.5696	67.3182	0.0406088	0.0103133	0.194689	0.95901	0.411201	0
	30	1296	92.4107	78.1861	61.1814	78.6552	0.0456727	0.00327516	0.23138	0.971217	0.477584	0
	60	32	79.1964	76.6224	57.384	69.6638	0.379648	0.000766526	0.187577	0.86429	0.366128	0.0405574
	90	32	75.9821	64.4253	66.3854	61.4543	0.181376	0.0176998	0.283911	1.01728	0.470694	0.012597
	120	0	80	72.0876	63.2911	67.0837	0.184054	0.0402078	0.706747	1.02793	0.48494	0.0194488
	150	0	64.7321	71.0711	55.5556	67.8655	0.13658	0.0138672	0.575095	0.969778	0.486341	0.00876686
	180	0	58.0357	74.355	57.384	65.4418	0.203239	0.0110798	0.458234	0.892332	0.415755	0.0122991
BT69	0	480	64.4643	79.7498	48.6639	73.3385	0.18683	0.0511482	0.719677	0.568612	0.100538	0.000510691
	30	0	56.3393	68.2565	42.3347	75.8405	0.161267	0.0618099	0.848742	0.61698	0.0840734	0
	60	0	63.6607	72.7912	53.8678	77.2478	0.149435	0.0698236	0.838398	0.85951	0.108828	0
	90	320	59.1071	78.6552	41.2096	83.8937	0.128789	0.0789522	0.728244	0.714579	0.0952832	0.00246834
	120		60.3571	76.8569	53.7271	79.7498	0.10308	0.062437	0.5498	0.470666	0.0711705	0.00246834
	150	48	52.2321	79.6716	48.2419	73.7295	0.0867197	0.0558867	0.552305	0.408249	0.0590265	0.000595806
BT70	0	320	97.8678	91.0127	73.6674	69.2582	0.197152	0.0325425	0.646134	0.812236	0.068368	0.043196
	30		89.2324	78.8732	80.8102	59.822	0.466417	0.0257832	0.738185	0.888704	0.0704698	0.0389402
	60	112	87.7399	91.0798	86.7804	71.632	0.269557	0.0376991	0.660115	0.823292	0.0652736	0.0365995
	90	0	55.3305	69.4836	96.6951	50.089	0.234694	0.109892	0.798151	0.966784	0.0784685	0.034344
	120	0	74.8401	74.5137	83.7953	53.2938	0.200463	0.054284	0.772532	0.783446	0.0927726	0.0368974
	150		84.1151	76.1905	77.8252	54.184	0.147195	0.0354693	0.530888	0.823004	0.0518453	0.0352377
	180	0	84.2217	78.0684	68.7633	58.635	0.12728	0.0258528	0.637405	0.724022	0.0681929	0.0447706
BT75	0	0	65.032	79.611	65.7783	75.6083	0.0112478	0.00898926	0.00153553	0.00932811	0.0136619	0
	30	0	72.6013	94.0309	85.7143	82.6706	0.0119781	0.005296	0.00177798	0.0101342	0.00980856	0
	60	0	61.4072	77.5989	81.7697	76.6766	0.0101765	0.00425074	0.000404086	0.0139346	0.00922472	0.000297903
	90	0	72.4947	83.2998	73.5608	78.5757	0.0125624	0.00578379	0.00258615	0.00944327	0.0078235	0
	120	32	69.1898	77.1294	65.032	66.5875	0.0107122	0.00634126	0	0.010998	0.00834895	0
	150	0	70.5757	78.5379	68.1237	71.8101	0.0127085	0.00752589	0.00121226	0.0105373	0.00829057	0
	180	0	66.4179	80.0134	63.113	72.0475	0.01042	0.00125432	0	0.0115738	0.0100421	0.00566016
BT77	0	64	79.7441	74.3125	68.2303	76.0831	0.0823536	0.0124498	0.123474	0.38745	0.25642	0.0117036
	30		76.6525	87.5922	72.7079	72.2255	0.0419999	0.00280402	0.0196825	0.06225	0.0715899	0.00650197
	60	32	81.0235	75.2515	62.6866	68.9614	0.0696549	0.010244	0.0994765	0.3101	0.204771	0.015239
	90	0	93.6034	79.4098	72.3881	67.181	0.079955	0.0106553	0.194993	0.1001	0.238688	0.0151577
	120		79.9574	71.831	45.4158	65.9347	0.081507	0.0126368	0.225788	0.23165	0.341488	0.0193027
	150	0	88.4861				0.0592607	0.00743999	0.0887191	0.1165	0.274318	0.0128008
BT82	0		69.1693	76.7507	67.7	71.5779	0.0158029	0.785873	0.981821	0.64045	0.437273	0.0341354
	30	16	69.9681	77.0308	64.6	70.6274	0.0151444	0.788303	0.990805	0.26465	0.431141	0.0306406
	60	64	65.8147	70.7283	61.3	60.1711	0.0154266	0.851449	1.09454	0.42	0.459479	0.0374676
	90	0	50.1597	61.7647	57.3	60.7414	0.0381903	0.8224	0.982885	0.53065	0.449481	0.134063
	120	32	68.6901	77.3109	67.2	64.1635	0.0277491	0.821876	0.963203	0.42345	0.417166	0.0597775
	150		54.3131	70.8683	58.8	62.1673	0.01886	0.813988	0.948603	0.2609	0.411918	0.0394995
	180	0	71.0863	76.1905	66.6	69.3916	0.0124636	0.843224	0.964621	0.3381	0.384299	0.0344605
BT83	0		51.9169	77.7311	72.2	79.8479	0.283088	0.379066	0.210183	0.9449	0.323591	0.273124
	30	0	51.4377	72.6891	61.4	60.3612	0.476249	0.423781	0.479237	0.95315	0.476659	0.213468
	60	192	69.8083	88.7955	73.3	75.5703	0.372449	0.477094	0.617251	0.8503	0.612878	0.234071
	90	0	67.2524	85.7143	68.3	75.1901	0.54186	0.424603	0.344887	0.89635	0.544492	0.219685
	120	0	69.4888	85.2941	71.6	69.8669	0.357822	0.342427	0.263202	0.90725	0.412415	0.190183
	150	0	50.4792	74.93	50.9	62.1673	0.598016	0.456756	0.283476	0.9892	0.525545	0.136785
	180	0	59.9042	76.8908	65.5	73.1939	0.206707	0.371364	0.190796	0.71525	0.397887	0.107364
BT84	0		70.1278	82.3529	74.2	74.9049	0.0562977	0.0990379	0.0212193	0.0973	0.261115	0.0305999
	30	16	73.1629	100.56	85.3	79.3726	0.0282194	0.0128985	0.004433	0.0177	0.0560125	0.000934659
	60	0	86.1022	103.081	96.5	83.5551	0.0240335	0.00807557	0.00390104	0.0094	0.032812	0.00101593
	90	0	70.7668	99.0196	89.6	86.4068	0.0329697	0.0116273	0.00998903	0.56815	0.0361816	0.00812747
	120	0	62.3003	83.1933	78.2	75.0951	0.00935944	0.017684	0	0.3965	0.000497152	0
	150	0	80.8307	91.3165	88.4	73.7643	0.00126987	0.0162259	0	0.14055	0.00911446	0
	180	0	70.2875	95.3782	82.6	76.9962	0.0151444	0.0142444	0	0.04645	0.00817539	0
BT85	0	64	43.8828	67.2485	44.2833	43.5831	0.00211079	0.0465318	0.360558	0.949153	0.183932	0.00766302
	30	0	50.5495	67.581	43.8567	44.8208	0.00763906	0.0490425	0.278114	0.974664	0.240569	0.00880807
	60	32	54.9451	67.7473	52.5597	50.2932	0.0120617	0.0410083	0.197467	0.853702	0.186139	0.0140929
	90	0	43.663	67.9967	50.8532	45.6678	0.00392004	0.0300727	0.308654	0.792467	0.185357	0.0147095
	120	0	42.0513	70.5736	48.3788	48.5342	0.00442261	0.034592	0.187756	0.781783	0.116538	0.000352323
	150	0	39.6337	70.4073	45.1365	45.7329	0.00824214	0.0668965	0.230289	0.947506	0.224939	0.00114505
	180	0	45.641	68.3292	53.413	49.7068	0.0181428	0.0296822	0.160566	0.825132	0.174232	0.00493252
BT89	0	16	64.1379	87.2433	85.5441	89.5995	0.172916	0.792788	1.30056	0.534603	0.706222	0.0256349
	30	1080	46.6897	39.0168	36.9341	49.4832	0.170576	0.957239	1.22774	0.487532	0.69556	0.00733422
	60	48	64.1379	44.4306	33.1215	55.8786	0.175357	0.914984	1.40338	0.43928	0.745268	0.0181609
	90	0	43.2414	38.7057	33.6775	39.9871	0.16605	0.810245	1.48068	0.403669	0.832469	0.00335279
	120	160	38.3448	41.1948	45.274	61.6279	0.145198	0.649538	1.48902	0.333383	0.698102	0.00377189
	150	32	28.6897	36.9011	44.7975	62.9199	0.152573	0.679734	1.57582	0.353401	0.935062	0.00984881
	180	0	26.3448	36.5277	47.8952	57.1705	0.108683	0.643265	1.39582	0.250799	0.863325	0.0233298
BT91	0	0	60.6897	73.491	75.5361	71.7054	0.000661149	0.0136151	0.0512289	0.0320693	0.239432	0
	30	32	46.5517	68.6994	74.027	80.7494	0.0168339	0.0144904	0.0478418	0.0252324	0.224251	0
	60	0	48.069	70.8152	77.0453	78.7468	0.0155624	0.0139069	0.0212899	0.0145099	0.181321	0.00405128
	90	1320	57.5862	88.4879	92.6132	86.1111	0.0306671	0.0253824	0.174009	0.0196744	0.175532	0.0145287
	120		58	85.3765	90.8658	82.1059	0.00951037	0.0115242	0.0374388	0.0175102	0.311311	0.0165544
	150	0	59.931	84.7542	82.0492	88.3075	0.0113412	0.0111352	0.0284874	0.0154444	0.277913	0.00349249
BT92	0	16	74.4828	95.5818	84.7498	94.7028	0.018207	0.0172134	0.0308462	0.102504	0.296342	0.00656587
	30	0	71.5172	81.7673	93.328	88.5013	0.0177493	0.0182345	0.0304228	0.103635	0.33447	0.0104775
	60	0	77.0345	86.2477	97.22	90.1809	0.0093578	0.016095	0.024556	0.0763858	0.270641	0.00356234
	90	28	42.2069	88.8612	78.0778	50.2584	0.00844236	0.0174079	0.0223181	0.0898136	0.294365	0.00251459
	120	32	50.9655	64.0946	57.9031	67.0543	0.0136298	0.0171161	0.0187496	0.0880921	0.287869	0.00293369
	150	0	73.5172	86.4966	75.4567	81.9767	0.015003	0.236611	0.0161489	0.0715164	0.221709	0.00740407
BT97	0	192	71.3793	76.3535	82.7641	75.7752	0.194886	0.0354965	0.54876	0.56559	0.228699	0.0209549
	30	0	62.7586	76.0423	84.2732	67.3127	0.0673354	0.0212979	0.430637	0.458856	0.215355	0.012084
	60	225	60.4828	81.7673	88.2446	66.9897	0.108937	0.0169703	0.365436	0.390045	0.197491	0.0150875
	90	32	61.3103	71.5619	50.6751	53.8114	0.107615	0.0138582	0.341001	0.547883	0.219732	0.0202564
	120	32	66.2759	80.5849	76.0921	65.5685	0.339017	0.0253338	0.366102	0.667159	0.274595	0.0115951
	150	16	58.1379	74.5488	88.0858	75.5168	0.173068	0.019985	0.241447	0.607841	0.215284	0.00859152
BT100	0	16	28.6039	29.7218	84.0864	33.537	1.09491	0.531962	0.264067	0.848803	0.481618	0.0147383
	30	560	40.9712	39.6779	86.5422	38.0177	1.03592	0.617542	0.301325	0.747873	0.706928	0.0182308
	60	19	41.5023	42.3865	91.1591	37.4067	0.903027	0.681728	0.424589	0.810241	0.753459	0.0157162
	90	0	34.9772	37.7745	87.3281	36.2525	1.11826	0.554767	0.349892	0.953913	0.783255	0.0487551
	120		33.0804	35.5783	93.0255	41.3442	0.963751	0.550439	0.267152	0.87556	0.720555	0.0262635
	150	0	26.6313	36.0176	94.2043	48.5404	0.733773	0.464956	0.197234	0.748316	0.551802	0.0261238
BT101	0	5120	80.1973	83.1625	90.3733	79.7692	0.0375838	0.0259659	0.21931	0.769613	0.111984	0.156813
	30		84.2944	86.164	75.1473	83.1636	0.173577	0.0275706	0.170561	0.594216	0.120034	0.0841689
	60		78.9074	84.9195	82.3183	74.2023	0.135841	0.0198392	0.2155	0.566819	0.129283	0.144449
	90	1488	72.3824	82.8697	72.6916	74.1344	0.0882888	0.0131289	0.138263	0.484826	0.0941911	0.118605
	120	112	79.6662	85.6515	80.0589	82.6205	0.0263951	0.0170189	0.14661	0.466824	0.0917905	0.0975801
	150	0	80.4249	83.9678	71.5128	88.5947	0.0917979	0.0160464	0.203706	0.428508	0.0820466	0.0754377
NR01	0		53.7729	74.8961	61.4334	60.5212	0.017851	0.016095	0.104393	0.491073	0.0446949	0.00551813
	30	0	48.0586	73.0673	60.5802	58.241	0.0163253	0.0148307	0.101067	0.708475	0.047025	0.00691512
	60	48	60.5128	78.9692	63.7372	61.8893	0.00549262	0.0173106	0.0868532	0.590084	0.0511908	0.00852167
	90	0	57.9487	81.7124	62.628	66.8404	0.011087	0.00972507	0.0413097	0.388668	0.0218885	0
	120	544	47.1062	75.2286	58.7031	57.329	0.0319386	0.0123508	0.106208	0.429886	0.0355159	0.00935986
	150		54.0659	72.153	58.7031	54.202	0.015359	0.0197905	0.0754824	0.281836	0.0501317	0.00607693
NR07	0	3920	56.7119	50.3459	39.065	37.3677	0.0299353	0.0624769	0.316805	0.385301	0.0649057	0.0572452
	30	560	58.8989	54.0354	34.3106	37.8968	0.0217966	0.0851094	0.582081	0.343987	0.086036	0.0500073
	60	140	56.1086	46.6564	38.5895	41.5344	0.0249772	0.0394532	0.607247	0.40661	0.0945185	0.0555344
	90	240	55.5807	41.5834	39.1442	46.2302	0.0131902	0.0397326	0.384733	0.313049	0.109893	0.0421114
	120	960	53.2428	51.5757	37.7971	40.873	0.0170257	0.0557709	0.307408	0.277762	0.115497	0.0128966
	150	0	49.0196	51.2683	40.2536	34.5238	0.00589351	0.0396208	0.382273	0.28298	0.131175	0.0230297
NR10	0	10	69.8341	71.176	51.5055	58.2672	0.118151	0.0283325	0.620555	0.927592	0.782731	0.505995
	30	48	73.6048	72.1752	53.4073	57.4074	0.0995348	0.0204531	0.54796	1.10465	0.769553	0.355315
	60	176	65.8371	62.721	58.5578	61.045	0.0883091	0.0231913	0.507027	0.941321	0.833095	0.214373
	90	112	69.3062	68.6395	58.0032	60.9127	0.0537899	0.0560504	0.486592	0.858633	0.828173	0.250037
	120	1120	61.5385	69.0238	52.2979	56.2169	0.108048	0.0241972	0.453858	0.895473	0.619823	0.205425
	150		51.7345	60.4151	48.1775	57.3413	0.138638	0.022409	0.430333	0.903798	0.58968	0.189765
NR11	0	16	48.7934	66.7948	36.8463	53.0423	0	0.0139707	0	0.162892	0.0727065	0
	30	0	47.2851	63.9508	41.2837	49.8016	0.020487	0.0142501	0.018669	0.249619	0.0618005	0.124492
	60	0	41.9306	68.6395	55.4675	51.2566	0.0115064	0.00698534	0.00782079	0.161277	0.0343841	0.014739
	90	0	38.7632	56.7256	37.084	47.3545	0.0100096	0.0061471	0.00504567	0.0972881	0.0478651	0.0967247
	120	96	56.4857	75.9416	70.4437	74.0079	0	0.00458238	0	0.0464075	0.0533938	0
NR12	0	48	47.5047	71.6263	68.1607	82.2476	0.207489	0.164072	1.0857	0.903363	0.0709646	0.214505
	30	0	53.6323	67.9931	76.9706	96.2541	0.170631	0.119757	0.972112	0.939085	0.0672535	0.18279
	60	20	53.6955	74.5098	77.4343	87.785	0.236302	0.130374	0.885579	0.93691	0.0595285	0.156865
	90	32	51.8004	77.105	76.3524	91.0423	0.215815	0.0837682	0.988321	0.958095	0.0594527	0.143705
	120	240	54.6431	75.7785	72.3338	77.5244	0.128535	0.0927653	1.05492	0.978099	0.0530909	0.126071
	150	0	53.6323	74.0484	70.0155	85.6678	0.413668	0.115733	1.00194	1.00587	0.0602101	0.100146
	180	0	54.0114	74.1638	74.6522	83.7134	0.243879	0.113889	0.924367	0.886092	0.0457445	0.129229
NR13	0	16	60.3285	76.1246	89.49	114.169	0.0259127	0.585818	0.949848	0.801415	0.288327	0.0296096
	30	0	57.2963	76.7589	83.4621	114.658	0	0.619795	0.862747	0.730593	0.260304	0
	60	0	67.4668	80.7958	83.153	96.5798	0.0080451	0.578666	0.817588	0.822041	0.194566	0.031452
	90	0	67.8459	71.2226	75.8887	88.5993	0.0130967	0.527589	0.533706	0.841051	0.203427	0.0325047
	120	48	59.8863	76.2399	79.4436	105.863	0	0.387044	0.68823	0.807255	0.222285	0.0289516
	150	64	52.4953	71.1073	73.2612	90.3909	0.00551932	0.561454	0.673093	0.696734	0.192294	0.0190817
	180	0	52.2426	73.6448	73.5703	93.1596	0.0103838	0.502777	0.697943	0.78284	0.211	0.0197397
NR14	0	0	71.6361	80.7958	78.6708	97.3941	0.176618	0.0846623	0.0825598	0.821357	0.103985	0.00289516
	30	0	82.7543	79.2964	74.4977	80.456	0.115906	0.0763358	0.160768	0.683067	0.129963	0
	60	16	70.3095	77.3933	75.2705	89.5765	0.0987864	0.09623	0.168525	0.661261	0.0641483	0.00342155
	90	128	75.4264	81.1995	70.9428	87.785	0.0976638	0.0723122	0.109933	0.55279	0.0795227	0.0136862
	120	16	68.0985	77.97	78.5162	100.489	0.0729672	0.0474444	0.11214	0.610815	0.0644513	0.0353999
	150	32	70.12	76.9319	77.1252	103.42	0.0876542	0.0670593	0.0695041	0.454197	0.0495313	0.0297412
NR15	0	0	58.8832	76.857	63.2979	78.5981	0.00888673	0.0273	0.659176	0.944566	0.690186	0.0331781
	30	0	57.1429	77.4708	62.5532	75.7944	0.00461296	0.03745	0.588311	0.990514	0.668207	0.0056015
	60	0	62.1465	71.0252	57.0213	76.6355	0.00583404	0.03515	0.624199	0.995017	0.555902	0.0398876
	90	13	61.1313	72.6212	61.383	77.4766	0.00936159	0.03285	0.559034	0.986111	0.502743	0.0276997
	120	48	57.9405	67.0964	60.4255	73.271	0.00691944	0.0222	0.630173	0.889256	0.664556	0.0408724
	150	16	63.4518	75.752	59.5745	78.6916	0.00440945	0.02365	0.588767	1.08813	0.6325	0.0289924
	180		56.1276	81.3382	62.9787	81.4953	0.00603755	0.0225	0.505361	0.837792	0.598399	0.0272688
	210	0	57.9405	74.7084	61.8085	84.1121	0.0099043	0.0244	0.540064	0.910813	0.449	0.0159427
NR19	0	480	74.5468	80.8471	76.1702	76.3551	0.0670236	0.03395	0.094624	0.474054	0.252941	0.0662331
	30	0	89.1951	82.4432	82.766	94.9533	0.0741465	0.0388	0.106526	0.496826	0.314424	0.079098
	60	0	65.4097	89.9939	80.4255	87.6636	0.104809	0.0627	0.103425	0.517725	0.292226	0.0790365
	90	0	96.9543	95.9484	85.5319	72.4299	0.376092	0.1454	0.309546	0.841081	0.451118	0.0869155
	120	80	86.8745	80.1105	78.4043	71.215	0.256358	0.0838	0.264765	0.667714	0.517639	0.0858075
	150	615	89.9202	77.7164	83.2979	66.4486	0.31904	0.0933	0.288204	0.719684	1.13393	0.103166
	180	96	72.2263	55.4942	74.1489	53.0841	0.324196	0.0946	0.230107	0.649446	1.00081	0.108275
	210	16	76.5772	76.857	84.5745	70.8411	0.213824	0.0777	0.19016	0.687398	0.800081	0.0666024
NR21	0	32	53.8071	46.7772	100.851	48.5047	0.112271	0.64225	0.980168	0.821042	1.02155	0.169584
	30	768	70.921	55.0645	135.957	67.0093	0.100061	0.48165	0.746732	0.729399	0.911582	0.143423
	60	660	60.116	46.1633	82.0213	43.7383	0.132962	0.7816	0.873642	0.928929	0.91998	0.151487
	90	576	63.6693	45.488	102.766	49.9065	0.105691	0.7463	0.884997	0.726819	0.859227	0.0709112
	120	0	59.2458	46.6544	115.213	57.4766	0.101078	0.4139	0.809617	0.516409	0.828778	0.0430269
NR23	0	112	67.9809	81.1073	81.7929	74.4055	0.00366323	0.02405	0.0677645	0.474712	0.110041	0.00412418
	30	680	67.264	80.7612	76.3725	72.8411	0	0.0238	0.0616082	0.47957	0.111575	0.000861768
	60	0	58.4827	79.7232	74.6352	73.4668	0.00373107	0.0376	0.094624	0.718014	0.200586	0.00393951
	90	0	34.767	68.7197	61.7095	57.3842	0.0164167	0.09835	0.265951	1.04299	0.594821	0.00984878
	120	0	46.4158	75.0173	78.5962	73.2165	0.0113289	0.06705	0.162662	0.931915	0.394308	0.00806369
	150	112	52.3895	79.5156	78.4573	72.0901	0.00481647	0.0639	0.121985	0.956609	0.310919	0.00363174
	180	400	53.4648	66.782	75.0521	71.3392	0	0.06615	0.10794	0.911471	0.230086	0
	210	16	56.8698	85.9516	79.2912	75.5945	0.00176378	0.0442	0.103653	0.845231	0.268787	0.00738659
NR28	0	0	47.2081	83.4254	72.9787	75.9813	0.0370394	0.08975	0.437642	0.76214	0.355827	0.0104643
	30	0	65.9898	73.4193	69.3617	80.5607	0.051828	0.10555	0.54207	0.877769	0.41417	0.0165583
	60	0	72.5163	82.566	74.8936	80.2804	0.0664809	0.1024	0.665332	0.997295	0.437317	0.019082
	90	16	65.6273	74.5856	77.5532	78.5981	0.041788	0.08455	0.557621	0.764366	0.379923	0.0213595
	120	48	63.5243	82.1977	79.4681	77.9439	0.0418558	0.0772	0.444437	0.810416	0.319901	0.00738659
	150	0	58.5932	84.469	73.0851	82.243	0.0419237	0.0794	0.434541	0.734106	0.324063	0.00929479
	180	0	68.3829	77.9006	74.2553	79.8131	0.0991108	0.1713	0.847968	0.837134	0.39387	0.0568767
NR30	0	1104	55.914	65.8131	55.8721	47.4343	0.163624	0.2218	0.876789	0.605775	0.557654	0.245481
	30	16	8.25568	10.5329	3.48853	2.21527	0.174682	0.09625	0.703364	0.495206	0.545679	0.216242
	60	0	57.8256	67.1972	68.6588	66.7084	0.142052	0.0637	0.498247	0.423248	0.540494	0.173277
	90	0	44.1458	59.3772	66.0876	63.0163	0.144087	0.0659	0.559855	0.428055	0.548308	0.198638
	120	0	45.8184	66.1592	67.6164	64.6433	0.126382	0.0571	0.569477	0.460695	0.397083	0.172785
	150	64	59.319	64.9135	47.672	43.3667	0.223729	0.1272	1.03156	0.593883	0.513477	0.196237
	180	96	74.1338	68.0969	48.9924	43.8048	0.230241	0.1011	1.13184	0.56256	0.56722	0.178571
	210	0	61.4098	82.0069	68.1028	64.6433	0.219794	0.1225	1.07995	0.505732	0.704497	0.16626
NR31	0	0	42.9194	110.64	56.3359	45.2466	0.0909441	0.101805	0.326509	0.19732	0.0998249	0.023211
	30	0	54.6841	100.471	75.4198	64.3498	0.0907408	0.101185	0.328373	0.150868	0.0932805	0.0210336
	60	0	66.3762	81.3559	49.0076	49.3274	0.100703	0.0867976	0.296625	0.226796	0.0689527	0.0226885
	90	0	65.7952	107.533	64.8855	69.7309	0.0837608	0.0961332	0.35447	0.219587	0.068763	0.0270868
	120	128	51.7792	90.0188	64.1221	62.1076	0.118051	0.103933	0.322489	0.181449	0.0615073	0.0310061
	150	0	49.4553	102.072	61.2214	45.6502	0.118051	0.0871817	0.33146	0.25947	0.0667238	0.0291771
	180	96	64.1249	80.4143	65.8015	50.2242	0.101313	0.073385	0.310373	0.2529	0.0491774	0.0309626
	210	16	66.0857	79.3785	51.4504	53.5874	0.0257517	0.0750099	0.325577	0.201855	0.0464269	0.0268255
NR34	0	0	57.9821	70.6742	34.2805	67.2677	0.258737	0.523208	0.0835932	1.08881	0.111443	0.133518
	30	16	49.4253	55.618	38.6801	71.5673	0.2462	0.375109	0.0692047	1.12683	0.103382	0.0900135
	60	0	63.6015	57.191	42.2548	58.8072	0.262803	0.350292	0.0482336	1.1259	0.0654434	0.0634928
	90	13	61.3027	59.8876	43.1714	58.2524	0.193815	0.344857	0.0446219	1.10311	0.0586619	0.0769491
	120	16	61.0473	53.7079	31.5307	57.975	0.271545	0.402436	0.0802728	1.15834	0.0865465	0.0929748
	150	0	54.5338	60.1124	29.1476	75.0347	0.292553	0.366689	0.080331	1.12131	0.0682887	0.0525623
	180	453	46.871	51.573	30.1558	57.6976	0.273781	0.357294	0.0663503	1.18218	0.0615547	0.0462914
	210	0	54.6616	48.2022	37.2136	79.889	0.288555	0.334989	0.0804475	1.27096	0.0523547	0.0666718
NR35	0	0	55.7416	65.0899	60.614	59.2885	0.000948747	0.00587908	0.0115341	0.0108137	0.0364207	0.00269997
	30	32	44.7368	75.0167	66.0353	58.8142	0.00399829	0.00324974	0.00803893	0.0106393	0.039266	0.0010016
	60	0	48.3254	71.2858	76.29	62.6877	0.0173485	0.00623359	0.00786417	0.00418594	0.0352825	0.00557413
	90	10	53.0303	59.8934	72.3057	60.2372	0.0105717	0.00762212	0.00664085	0.00686029	0.038697	0.00426769
	120	32	67.7033	81.7455	60.5487	91.0672	0	0	0	0.00965091	0.0187794	0
	150	133	53.2695	67.555	51.2084	53.2806	0.00338838	0.0030134	0.00343693	0.0113369	0.0294969	0
	180	48	48.0861	75.2165	67.7335	56.2846	0.00467597	0.000265888	0	0.0179065	0.0181629	0
	210	0	54.2265	68.6209	69.6277	53.2016	0.00643792	0.00472689	0.00588356	0.0119183	0.0287856	0.00352738
NR37	0	0	52.0615	62.0393	46.7397	50.6329	0.00596355	0.0413012	0.294062	0.701203	0.0690949	0.00339674
	30	0	48.218	55.1597	63.0151	48.0346	0.00840318	0.0781415	0.314916	0.536091	0.0867836	0.00513865
	60	0	52.2013	58.9681	61.398	50.7662	0	0.049337	0.195847	0.47772	0.054299	0.00570477
	90	840	49.3361	60.8722	54.8774	42.0386	0	0.112855	0.279673	0.413536	0.0446248	0
	105		60.7268	58.1081	59.6244	45.9694	0.00704783	0.140477	0.238663	0.307318	0.058899	0.00779507
	120	0	55.6254	51.5356	46.844	39.8401	0	0.0315816	0.178488	0.296737	0.0202021	0
	150	10	46.6108	57.1253	65.6234	43.7708	0	0.0220982	0.149885	0.203134	0.0345712	0.0121499
	180	80	52.97	63.0835	64.1106	59.1606	0	0.0345359	0.199983	0.185809	0.0557217	0.00823055
	210	0	56.8833	59.2138	59.2071	54.8301	0	0.0614792	0.164099	0.349875	0.0497939	0
NR38	0	480	66.5824	50.6344	91.9629	101.792	0.0938596	1.33098	1.28216	1.31347	1.05971	0.18798
	30	0	74.4157	64.0715	96.2906	114.821	0.101871	1.37739	1.18121	1.20503	1.03655	0.117131
	60	80	65.1927	60.1499	86.8624	108.469	0.093185	1.28231	1.19289	1.12726	1.01514	0.286509
	90	420	74.6684	60.6113	89.1808	112.378	0.0867759	1.41195	0.979813	1.23428	1.05315	0.1271
	120	480	58.4965	54.729	91.9629	103.909	0.110641	1.21854	1.25345	1.30705	1.19166	0.158163
	150	680	62.729	55.4787	100.155	113.192	0.0558266	1.21911	1.24095	1.18862	0.977709	0.0984401
	180	3200	44.9147	61.188	56.4142	74.7557	0.0979074	0.821824	0.41975	1.103	0.223709	0.106985
	210	1984	61.5919	62.6874	93.3539	111.238	0.0373583	1.3021	1.07326	1.12155	1.10879	0.0876705
NR39	0	0	31.8545	48.0856	44.9555	36.5465	0.027829	0.849245	0.174834	1.11727	0.133847	0.0683563
	30	16	37.0182	56.7568	41.7656	35.0664	0.134169	0.756273	0.133543	1.10657	0.209145	0.0828642
	60	80	33.0909	49.8874	40.8012	31.0436	0.0635007	0.618356	0.194251	1.06733	0.191085	0.0976391
	90	176	6.63273	4.27928	19.5104	6.45161	0.135434	0.873908	0.453973	1.16436	0.217592	0.129592
	120	0	34.4	51.6892	43.6202	35.2562	0.0306962	0.61	0.402862	1.10586	0.223272	0.102356
	150	16	69.8182	80.6306	69.5104	110.247	0	0.690316	0.251537	1.07732	0.181473	0.0894506
NR40	0	0	83.3722		83.4684		0.165625	0.22156	0.151324	0.34888	0.0518493	0.00987962
	30		87.9565		91.329		0.334201	0.216205	0.177066	0.400963	0.0297114	0.0142409
	60	0	81.7405		78.0389		0.261255	0.26545	0.189192	0.391688	0.064666	0.0219844
	90	20	87.568		86.3047		0.843134	0.635474	0.32348	0.473022	0.0294201	0.00614138
	120	280	88.6558		85.4943		0.794054	0.612271	0.28085	0.455185	0.0438389	0.0126388
	150	0	83.9161		87.8444		0.819522	0.674821	0.259572	0.388834	0.0518493	0.0140629
	180	0	91.2976		91.8152		0.744552	0.590691	0.239336	0.416659	0.0434019	0.01611
NR41	0	0	46.5686	43.0605	49.6413	56.1189	0.399473	0.0278268	0.449509	0.920359	0.668943	0.031775
	30	0	45.4044	37.4555	66.2123	51.049	0.434132	0.0157388	0.374739	0.749843	0.557962	0.00987962
	60	0	45.3431	49.0214	63.4146	69.9301	0.245907	0.0140351	0.146563	0.413091	0.427902	0.015843
	90	3200	41.6667	45.8185	57.8192	61.8881	0.235197	0.019714	0.247297	0.335325	0.659768	0.0284818
	120	64	43.9951	49.3772	63.8451	75.6993	0.225921	0.00859954	0.152887	0.301792	0.571944	0.0106807
	150	5000	46.5686	45.5516	63.056	86.3636	0.258388	0.0116013	0.269318	0.941049	0.636902	0.0267017
	180	0	43.2598	50.089	79.4835	70.1049	0.229378	0.0109522	0.131311	0.523677	0.499996	0.00658641
NR46	0		81.25	77.2242	85.3659	86.3636	0.0616454	0.0881859	0.10743	0.958885	0.00378675	0.378363
	30	0	89.7672	70.5516	73.6729	99.1259	0.0439361	0.0470541	0.0191201	0.527244	0	0.17098
	60	0	96.0172	84.4306	82.3529	115.909	0	0.0409695	0.026783	0.534379	0.00393239	0.21566
	90		73.223	69.573	67.6471	77.972	0.124471	0.0766657	0.216571	0.589315	0.0862213	0.488195
	105		66.1765	59.7865	71.6643	64.6853	0.173636	0.0801542	0.215306	0.553642	0.0651029	0.450101
	120	0	65.8701	68.8612	75.9684	75.5245	0.114352	0.0378055	0.0944846	0.853294	0.0672876	0.0989742
	150	32	83.2108	72.5979	67.7188	100.874	0.0533811	0.0182537	0.0162186	0.555783	0.0164578	0.0791259
	180	320	73.5294	58.0071	69.1535	94.0559	0.0384546	0.0255552	0.0258903	0.385266	0.0383044	0.106095
	210	16	68.6887	68.0605	61.7647	107.517	0.0504295	0.0265288	0.0139123	0.337465	0.00917558	0.0566075
NR47	0	112	78.7377	68.8612	71.4491	76.3986	0.00244558	0.0511916	0.228251	0.578613	0	0
	30	48	58.5172	57.2064	58.6801	54.1958	0.0138302	0.0245006	0.162409	0.86685	0	0
	60	192	73.3456	63.79	55.8824	72.3776	0.0169504	0.0460806	0.182645	0.555069	0	0
	90	320	74.9387	56.0498	62.769	72.5524	0.0682232	0.0516784	0.134882	0.318202	0.0327699	0.00507332
	120	140	66.299	58.452	42.9699	63.4615	0.0443577	0.0310719	0.129823	0.401676	0.013108	0.00498431
	150		65.8088	62.9004	55.9541	69.4056	0.0135772	0.00941082	0.102594	0.418799	0.00553447	0.000267017
NR48	0	96	75.6449	57.9063	94.7937	57.5017	0.045147	1.23554	0.0433623	0.670272	0.417616	0.326108
	30	1696	66.2367	57.9795	82.22	46.7074	0.0739012	1.21457	0.0532849	0.830927	0.413251	0.399447
	60	8000	66.3885	55.1977	85.6582	51.6633	0.0568753	1.13272	0.0406959	0.71373	0.407936	0.270459
	90	480	68.2853	58.0527	86.6405	53.8357	0.0415153	1.19545	0.0375923	0.850352	0.370202	0.209655
	120	160	64.0364	53.5871	80.6483	51.1881	0.0617065	1.21109	0.0576124	0.815206	0.559821	0.3347
	150	4587	68.8164	55.7833	82.9077	48.8798	0.0309199	1.08527	0.0789875	0.781481	0.628227	0.251606
	180	768	62.4431	55.8565	82.22	48.2688	0.0362842	1.03615	0.0539406	0.691204	0.466321	0.257116
NR49	0	0	100.966	89.9272	56.8103	76.3245	0.00403158	0.0208793	0.529396	0.224443	0.0433902	0
	30	160	87.7682	95.267	69.2241	64.6523	0.0119615	0.0414874	0.496306	0.216087	0.122123	0
	60		98.4979	107.039	66.2069	90.4801	0.018492	0.030641	0.500196	0.169786	0.119313	0
	90	16	99.3562	121.238	76.7241	91.6391	0.0162596	0.0234101	0.468024	0.133176	0.0983586	0
	120	80	100.858	113.835	75.6034	83.2781	0.0295205	0.054006	0.440223	0.132228	0.0780492	0
	150	960	113.734	92.233	71.9828	84.106	0.0221903	0.0450125	0.450976	0.289524	0.10933	0
	180	2880	92.7039	85.3155	60	58.8576	0.0319194	0.0754728	0.513878	0.476883	0.100636	0
NR51	0	0		103.155	74.569	100.331	0.246793	0.594563	0.748349	0.547605	0.419211	0.00510491
	30	0		66.0194	71.1207	97.1854	0.257854	0.669086	0.797306	0.557296	0.352436	0.0047511
	60			100.485	81.8966	82.7815	0.263252	0.834494	0.727498	0.536579	0.422134	0.011524
	85			104.005	77.7586	88.245	0.289841	0.748175	0.799798	0.571337	0.42779	0.0121305
	90	240		101.699	79.1379	71.6887	0.241761	0.623532	0.699916	0.522667	0.383944	0.00975493
	120	0		87.5	74.3103	100.248	0.345383	0.745734	0.781439	0.531884	0.40562	0.013293
	150	0		111.408	72.069	97.8477	0.333022	0.834132	0.768806	0.532358	0.415414	0.00323479
NR59	0	0	102.228	87.5126	103.748	70	0.0292539	0.886285	0.824626	0.237365	0.41587	0.365532
	30	0	102.351	75.7301	90.3353	67.125	0.0669375	0.78808	0.975476	0.329493	0.567033	0.381655
	60	60	89.3564	72.4068	88.7574	59.25	0.0353513	1.0474	0.899287	0.319544	0.616611	0.390045
	90	0	90.3465	64.5519	83.2347	61.375	0.0332522	0.879145	0.874108	0.255928	0.616953	0.402782
	120	16	88.9851	69.6878	85.2071	63.875	0.0288208	0.557549	0.852165	0.229052	0.573904	0.445189
	150	240	100.743	80.3625	95.4635	58.75	0.0235231	0.694711	0.885867	0.238958	0.575802	0.365683
NR60	0	0	82.2478	70.6742	48.8543	76.4216	0.247126	0.309348	0.203436	0.377087	0.279701	0
	30	1216	87.8672	75.3933	51.6957	67.4064	0.203711	0.510142	0.12117	0.349823	0.272299	0
	60	4000	66.4112	74.4944	30.6141	54.3689	0.225002	0.588642	0.155833	0.364338	0.280385	0
	90	16	64.1124	70.8989	46.0128	62.2746	0.224536	0.884703	0.242601	0.389922	0.31717	0
	120	336	74.2018	65.618	52.9789	67.8225	0.222736	0.970977	0.172138	0.471843	0.382729	0.00510491
	150	64	71.3921	86.5169	54.6288	65.1872	0.193016	0.841137	0.236744	0.54248	0.313601	0.0138995
NR61	0	64	68.3168	84.5198	59.9418	75.2322	0.0319528	0.182219	0.0714254	1.06385	0.049464	0.0384132
	30	0	71.1634	80.226	65.7614	62.6419	0.0255889	0.210465	0.0609782	1.10921	0.0489705	0.0300735
	60	0	69.6782	65.9887	68.9622	68.5243	0.012961	0.106927	0.0113651	1.20797	0.0276361	0.0206724
	90	0	69.802	70.9605	66.0524	62.0227	0.021524	0.257511	0.0243476	1.16589	0.0358738	0.0432654
	120	64	72.5248	69.4915	59.4568	73.8906	0.0362509	0.187281	0.0466844	1.05808	0.0329507	0.050392
	150	96	13.2673	1.80791	3.43356	4.6646	0.0248892	0.163283	0.05888	1.0378	0.0283194	0.0220876
IG03	0	160	94.7097	81.3505	108.846	60.9626	0.0546724	0.322657	0.0620974	0.239135	1.08758	0.00857455
	30	0	84.7742	75.5627	92.5	51.3369	0.031322	0.501516	0.187665	0.231734	1.06943	0.00924939
	60	256	96.129	71.3826	90.3846	53.2977	0.0491254	0.490073	0.139342	0.227051	1.20743	0
	90	40	89.4194	69.2926	100.769	60.7843	0.027303	0.297433	0.0853438	0.161273	1.05838	0.00170697
	120	16	89.8065	81.9936	101.346	59.3583	0.0998784	0.420779	0.184233	0.176906	1.32904	0.00472394
	150	0	94.8387	84.8875	107.692	70.0535	0.0259411	0.263833	0.123691	0.111317	1.2746	0.000595455
	180	0	85.1613	75.2412	100.962	57.2193	0.0449071	0.305955	0.101269	0.127667	1.17342	0.00452545
IG04	0	1600	85.5484	83.6013	73.0769	79.6791	0.0162423	0.0301913	0.00260836	0.109164	0.0319171	0
	30	0	76.3871	107.878	81.1538	82.5312	0.0196302	0.0430469	0.0138655	0.114451	0.0780196	0
	60	128	82.4516	108.039	91.5385	75.0446	0.020361	0.0597008	0.0262667	0.128233	0.117864	0
	90	653	78.4516	82.6367	73.2692	67.7362	0.0245129	0.0536139	0.0235668	0.192425	0.126521	0.00190545
	120	0	79.3548	73.955	65.3846	67.5579	0.017903	0.0396869	0.0183043	0.359627	0.0761421	0
	150	32	82.7097	82.9582	76.1538	60.9626	0.0310563	0.0446052	0.0111199	0.176717	0.0865725	0.00472394
	180	0	79.2258	75.2412	74.4231	66.6667	0.0210585	0.0362782	0.0160163	0.111657	0.110875	0.00107182
1G05	0	0	56.8505	53.1633	61.6145	52.9661	0.428843	1.15866	0.0907894	0.86025	0.860823	0.0401733
	30	48	47.6868	37.2449	87.3147	55.7203	0.524403	1.06965	0.103007	0.851377	0.690911	0.0229448
	60	416	48.7544	47.7551	77.2652	63.0297	0.801385	1.1721	0.161627	0.877469	1.43304	0.0304079
	90	160	32.7402	29.4898	75.1236	43.75	0.498562	1.06132	0.145245	0.682325	1.34094	0.0375533
	120	0	34.2527	29.5918	53.8715	37.7119	0.364239	1.12901	0.0875404	0.686705	1.38057	0.0543848
	150	16	34.1637	35.8163	62.9325	47.4576	0.224967	1.12502	0.0815457	0.739758	1.16393	0.0331867
	180	0	30.2491		74.6293	44.2797	0.0945972	1.00055	0.0599466	0.626213	1.12419	0.0150452
IG06	0	640	81.1333	76.2259	60.6345	57.8335	0.00617804	0.00564869	0.011486	0.465884	0.0132466	0
	30	0	74.0971	64.8665	62.5147	61.8727	0.00664306	0.0124661	0.0227889	0.300495	0.0206522	0
	60	496	81.1333	76.288	68.1551	69.7062	0.00584589	0.00745043	0.0241617	0.224068	0.00667547	0
	90	0	85.1183	84.9162	58.6369	68.7882	0.0133193	0.0270261	0.042649	0.186573	0.0238857	0
	120	32	89.6638	85.6611	82.0212	66.3403	0.00823739	0.00842434	0.0279141	0.176226	0.0146026	0
	150	0	84.4334	86.2197	79.671	66.0343	0.00936671	0.0113461	0.0388967	0.242948	0.0206522	0
	180	0	87.9826	74.2396	67.4501	78.7026	0.00627769	0.00959304	0.0389882	0.235661	0.0192963	0.00262
IG07	0	320	73.4745	63.9975	41.3631	44.7368	0.00810453	0.0475269	0.86195	1.1305	1.12398	0.00238182
	30		75.467	67.5357	34.7826	46.022	0.0239814	0.0153391	0.865519	1.1717	0.984006	0
	60	2960	68.9913	72.3774	37.7203	46.0832	0.0183348	0.0203061	0.652183	0.988937	0.863639	0
	90		71.9178	65.9839	27.3796	39.9633	0.0100642	0.024153	0.966925	0.943134	0.979938	0
	120	32	73.9726	59.9628	36.5452	42.5337	0.0162091	0.0485495	0.856642	0.890307	0.856338	0.00460485
	150	0	73.0386	72.067	39.0129	47.4296	0.0146147	0.020793	0.85806	1.06763	0.71365	0
	180	48	70.9838	70.329	29.9647	43.5741	0	0.00954434	0.776926	0.98803	0.640532	0.0485097
	210	0	69.4894	67.1633	36.1927	43.4517	0	0.0169948	0.835912	1.06487	0.519748	0.0728042
IG10	0	1280	86.5504	86.406	81.1986	90.7589	0.0642808	0.0158715	0.0094456	0.708546	0.0254271	0.06026
	30	0	85.2428	76.4742	48.5311	82.9253	0.0590119	0.0289128	0.0295688	0.785454	0.0333989	0.0590271
	60	160	82.8767	81.9988	60.7521	87.4541	0.0500798	0.0315211	0.0101027	0.717988	0.033124	0.0652688
	90	0	83.4371	79.702	67.6851	71.2362	0.0551982	0.0175919	0.00744696	0.738962	0.0371099	0.0602985
	120	0	76.4633	81.5642	75.9107	70.9302	0.0638292	0.0183133	0.0128405	0.726714	0.0178677	0.0479691
	150	0	94.8319	87.0267	81.3161	67.9315	0.0627252	0.0214765	0.00988365	0.647715	0.0580014	0.0590271
	180	0	83.9975	71.8187	68.1551	96.7564	0.0376351	0.0150946	0.00750172	0.617809	0.0613	0.0614159
IG12	0	160	64.4612	68.3345	55.4554	64.7498	0.00356279	0.0210326	0.0101848	0.184894	0.084803	0.0575629
	30	0	72.4008	79.8492	63.7511	64.6751	0.00943387	0.0285799	0.0224504	0.139168	0.0240527	0.0492021
	60	96	65.4064	83.0706	73.1289	60.7916	0.0103873	0.0285244	0.014319	0.121	0.0457689	0.0509744
	90	15	77.8828	88.1426	89.2696	62.4347	0.00918297	0.0268595	0.0152225	0.233784	0.049205	0.0654229
	120	0	74.8582	84.9212	64.5627	65.422	0.00381369	0.0297453	0.00908968	0.174483	0.0846655	0.0645753
	150		58.7902	78.684	55.8161	64.6751	0.00727612	0.0284689	0.0176865	0.13682	0.0210289	0.0439621
	180	0	59.9244	71.3502	56.4472	59.8208	0.00557	0.0281359	0.0112526	0.111048	0.0398588	0.0533632
SS01	0	320	51.8375	69.8983	59.4814	59.1941	0.440582	0.933369	0.404381	0.78428	1.09667	0.156853
	30		43.2302	63.9322	62.2366	58.7401	0.406008	1.21562	0.454292	0.827148	1.13213	0.175078
	60	0	47.2921	61.2881	53.9708	61.0102	0.33134	1.13071	0.516086	0.983463	0.689282	0.116898
	90	96	45.9381	64.8136	55.0243	58.059	0.28678	1.01467	0.451691	0.930388	1.10258	0.127648
	120	128	43.0368	72.4068	61.1831	61.748	0.257876	1.05368	0.477153	0.789383	1.06217	0.137011
	150	0	48.4526	69.1525	60.0486	58.6833	0.244678	1.11484	0.45974	0.768051	0.773123	0.141018
	180		52.2244	69.5593	59.6434	51.8729	0.179946	1.0271	0.443012	0.730185	0.861224	0.104492
	210	16	65.1838	71.0508	66.3695	52.6674	0.165594	0.970828	0.385216	0.738452	0.750307	0.124026
SS02	0	240	66.3443	74.5085	58.59	58.6266	0.0318142	0.757894	0.302423	0.381525	0.163971	0.0708941
	30	0	66.8279	77.7627	66.0454	59.4211	0.0313626	0.913946	0.382369	0.635518	0.435698	0.106842
	60	87	61.0251	86.5085	61.3452	54.0863	0.0358286	0.81805	0.383491	0.56698	0.151463	0.0477765
	90	0	56.5764	80.339	60.2917	58.1725	0.0206742	0.627425	0.292896	0.45583	0.166857	0.0702776
	120	0	74.0812	64.2034	60.4538	54.597	0.0503809	0.73836	0.276167	0.781422	0.184862	0.07598
	150		57.06	64.6102	50.2431	52.6674	0.136139	0.680256	0.281725	0.56943	0.153525	0.0648065
SS03	0	0	64.7951	80.4539	86.2475	78.8187	0.0133479	0.469542	0.190418	0.726357	0.832224	0.151575
	30	0	98.0273	88.4334	96.9548	83.5709	0.0375849	0.804565	0.289391	0.851593	1.54171	0.2316
	60	16	90.9712	91.6545	98.9194	86.3544	0.0139501	0.329695	0.175989	0.723193	1.35286	0.225012
	90	0	106.222	88.7994	99.0177	79.294	0.0158067	0.452783	0.159617	0.796426	0.628669	0.182437
	120	0	72.9135	78.0381	97.6424	54.5825	0.090525	1.1185	0.475264	1.26797	1.12773	0.240269
	150	624	68.7405	76.0615	83.89	57.5017	0.0255417	0.633474	0.25692	0.85098	1.24579	0.262578
	180	32	82.17	78.4773	97.8389	66.8024	0.0171616	0.999297	0.233977	0.94136	1.18559	0.205439
SS04	0	160	69.1211	66.9538	110.648	79.561	0.113106	0.0758615	0.035948	0.103036	0.323268	0.0666174
	30		64.4497	80.7361	106.481	69.4102	0.112554	0.070423	0.0342232	0.109415	0.180601	0.0702776
	60	0	22.0111	60.7674	175.926	46.1591	0.279855	0.170813	0.0583984	0.5482	0.579464	0.148801
	90	16	68.9628	78.935	103.704	76.5432	0.166046	0.0970051	0.0292677	0.279305	0.430612	0.100793
	120	0	59.1449	74.5497	96.7593	62.8258	0.348501	0.164764	0.028638	0.330849	0.302927	0.0838015
	150	32	53.6025	75.5677	125.926	68.0384	0.293403	0.0996688	0.0273512	0.279101	0.220048	0.0839171
	180	0	61.2827	71.2608	81.9907	65.0206	0.276643	0.0988919	0.051061	0.401377	0.270627	0.0860747
	210	0	59.5408	73.2968	58.2407	60.6996	0.21161	0.0606004	0.0372896	0.369379	0.126723	0.0676962
SS05	0	0	34.6471	35.568	49.4942	35.0482	0.101169	1.12406	1.08766	1.06399	0.54225	0.0544615
	30	2048	39.3217	40.3166	52.3735	39.2283	0.0824211	1.19314	1.37481	1.0324	0.759	0.0470265
	60	32	36.4803	40.1304	45.0584	40.1929	0.157135	1.16618	1.39321	1.00571	0.8109	0.0631977
	90	32	39.3217	41.527	61.323	43.9711	0.469529	1.11506	1.03098	0.948148	0.75535	0.0379186
	120	0	29.8808	34.8231	54.8638	38.9068	0.329407	1.10431	1.54684	1.15886	0.63565	0.04856
	150	16	34.8304	40.689	53.2296	38.5852	0.20581	0.98888	1.62003	0.967847	0.66495	0.0502793
	180	0	32.1723	39.3855	42.9572	32.7974	0.174494	0.979518	1.3924	0.942228	0.68335	0.035874
SS07	0	360	74.1522	97.486	53.0739	66.6399	0.0297188	0.447915	0.15998	0.186782	0.05535	0
	30		72.7773	102.514	76.0311	80.627	0.0127763	0.397661	0.152269	0.186118	0.05325	0.00106878
	60	0	78.9184	93.6685	62.6459	75.8842	0.0186784	0.384493	0.144151	0.172595	0.03585	0
	90	27	62.3281	100.279	70.7393	73.7138	0.0318713	0.363095	0.149766	0.165858	0.05375	0.00469336
	120	0	84.6013	87.9888	55.7977	52.4116	0.0199283	0.304868	0.139822	0.154682	0.0468	0
	150	0	91.2924	103.724	60.6226	72.1061	0.00409675	0.304765	0.160657	0.15555	0.04815	0.00255579
	180	0	58.4785	89.2924	67.1595	75.1608	0.0117348	0.34216	0.14246	0.166573	0.05105	0.000743502
	210	16	72.6856	81.0987	66.9261	68.7299	0.0343016	0.281979	0.120814	0.123348	0.03275	0
SS08	0	0	93.2821	59.1753	45.4844	74.4129	0.0434672	0.0500998	0.125684	0.591986	0.2013	0
	30		94.0499	69.8969	59.2775	88.7515	0.0708946	0.10164	0.138401	0.537636	0.4621	0
	60	64	66.4107	66.3918	64.8604	96.2917	0.0589516	0.0963419	0.0911853	0.286501	0.382	0.00111525
	90	227	56.238	75.3608	65.0246	89.4932	0.146372	0.212538	0.207129	0.381984	0.3802	0.0216545
	120	0	54.1267	73.8144	45.3202	69.7157	0.158176	0.186203	0.162618	0.345853	0.3768	0.0229092
	150	0	61.8042	71.8557	62.7258	74.7837	0.122069	0.112647	0.330175	0.349527	0.2879	0.0301583
	180	48	66.0269	65.7732	61.0837	84.178	0.0783938	0.0782874	0.299667	0.267925	0.24825	0.0330394
SS09	0	240	72.7941	69.1898	73.1343	80.7418	0.00326351	0.0295249	0.046675	0.213013	0.2227	0
	30		78.6765	74.7335	78.8913	91.4408	0.00736027	0.0335885	0.0419398	0.160602	0.24665	0.009712
	60	0	69.3015	68.9765	85.2878	79.4579	0	0.00750983	0.00426163	0.212809	0.21415	0
	90	16	92.0956	70.7889	91.4712	87.4465	0	0.00895007	0.00432927	0.204542	0.19615	0
	120	0	84.5588	63.5394	65.6716	90.2996	0	0.0219637	0.0187376	0.17581	0.1977	0
	150	0	71.6912	64.8188	62.8998	76.4622	0	0.0195976	0.0284109	0.130747	0.198	0
	180	0	70.5882	63.3262	70.3625	88.0171	0	0.0256157	0.0153554	0.151824	0.20615	0.0076209
	210	0	68.5662	69.5096	78.4648	87.7318	0.00673534	0.0233525	0.0198876	0.148507	0.18325	0.00999081
SS11	0	0	76.6214	85.0115	69.7306	78.836	0.0153455	0.043413	0.0248257	0.102628	0.1692	0.0282066
	30		78.4314	77.5557	77.9715	79.2989	0.0145122	0.0274675	0.0224581	0.0679253	0.1343	0.0138942
	60	0	68.7783	82.475	74.9604	80.291	0	0.0645537	0.0570923	0.196325	0.2263	0.00478629
	85	100	74.8115	76.6334	74.2472	83.664	0.0140956	0.0500998	0.0592569	0.186425	0.18275	0.00427514
	90		80.6184	78.9393	79.477	87.1032	0.0159704	0.0455219	0.0405869	0.172391	0.16725	0.00413573
	120	0	73.3786	77.7095	69.4136	75.463	0.0279135	0.0366747	0.032199	0.140597	0.18305	0.0132901
	150	0	79.7888	81.3221	70.206	58.7963	0	0.0243298	0	0.12692	0.1401	0.00920084
	180	0	65.46	78.555	72.8209	85.0529	0.0100683	0.0354917	0.0163701	0.106251	0.1266	0.00924731
	195		2.86576	78.7855	8.58954	5.03968	0.0387456	0.117585	0.731647	0.154325	0.02975	0.0151024
	210	0	77.3756	85.3958	78.6054	81.6799	0.00118042	0.0147625	0.00412634	0.0819085	0.09335	0
